# Supplementary material
Source: PubMed Central journal article supplement (PMC3443555)
Supplement: NIHMS167914-supplement-2_si_003.pdf [file NIHMS167914-supplement-2_si_003.pdf]

$^1\text{H}$  NMR for 3a – 400 MHz,  $\text{CDCl}_3$

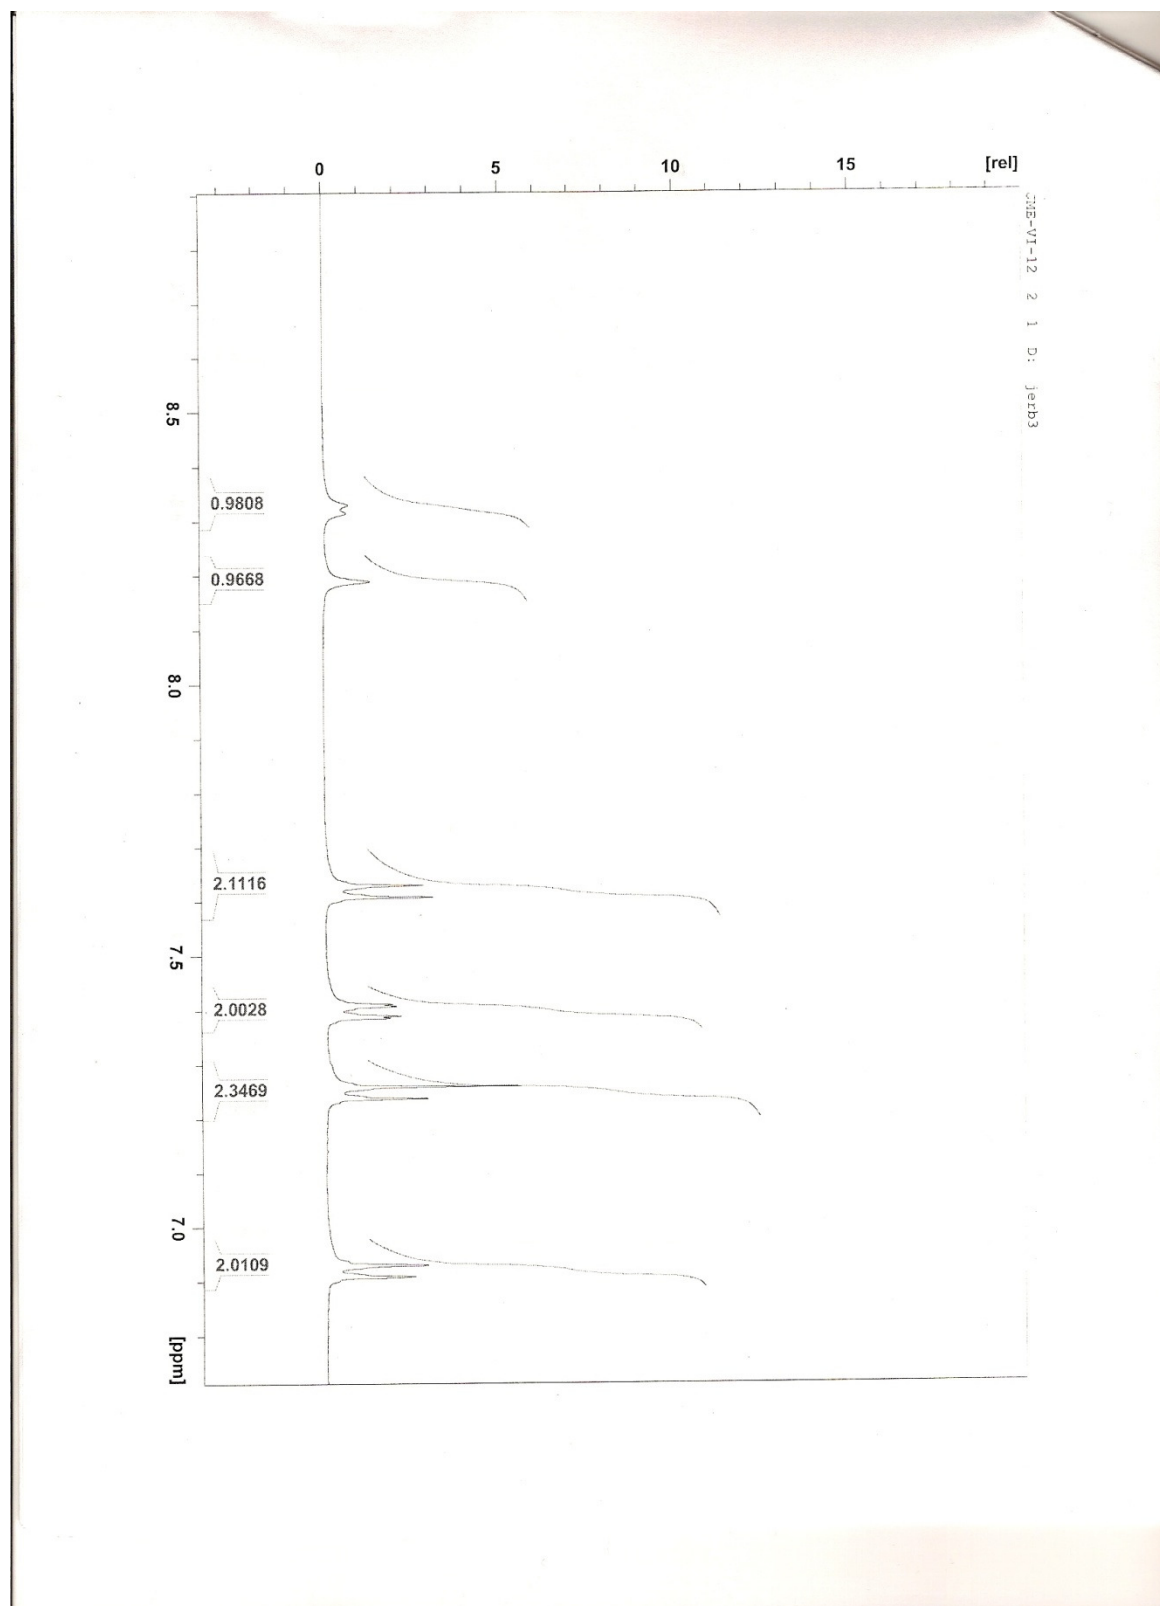

[SP: 2]

$^1\text{H}$  NMR for 3a – 400 MHz,  $\text{CDCl}_3$

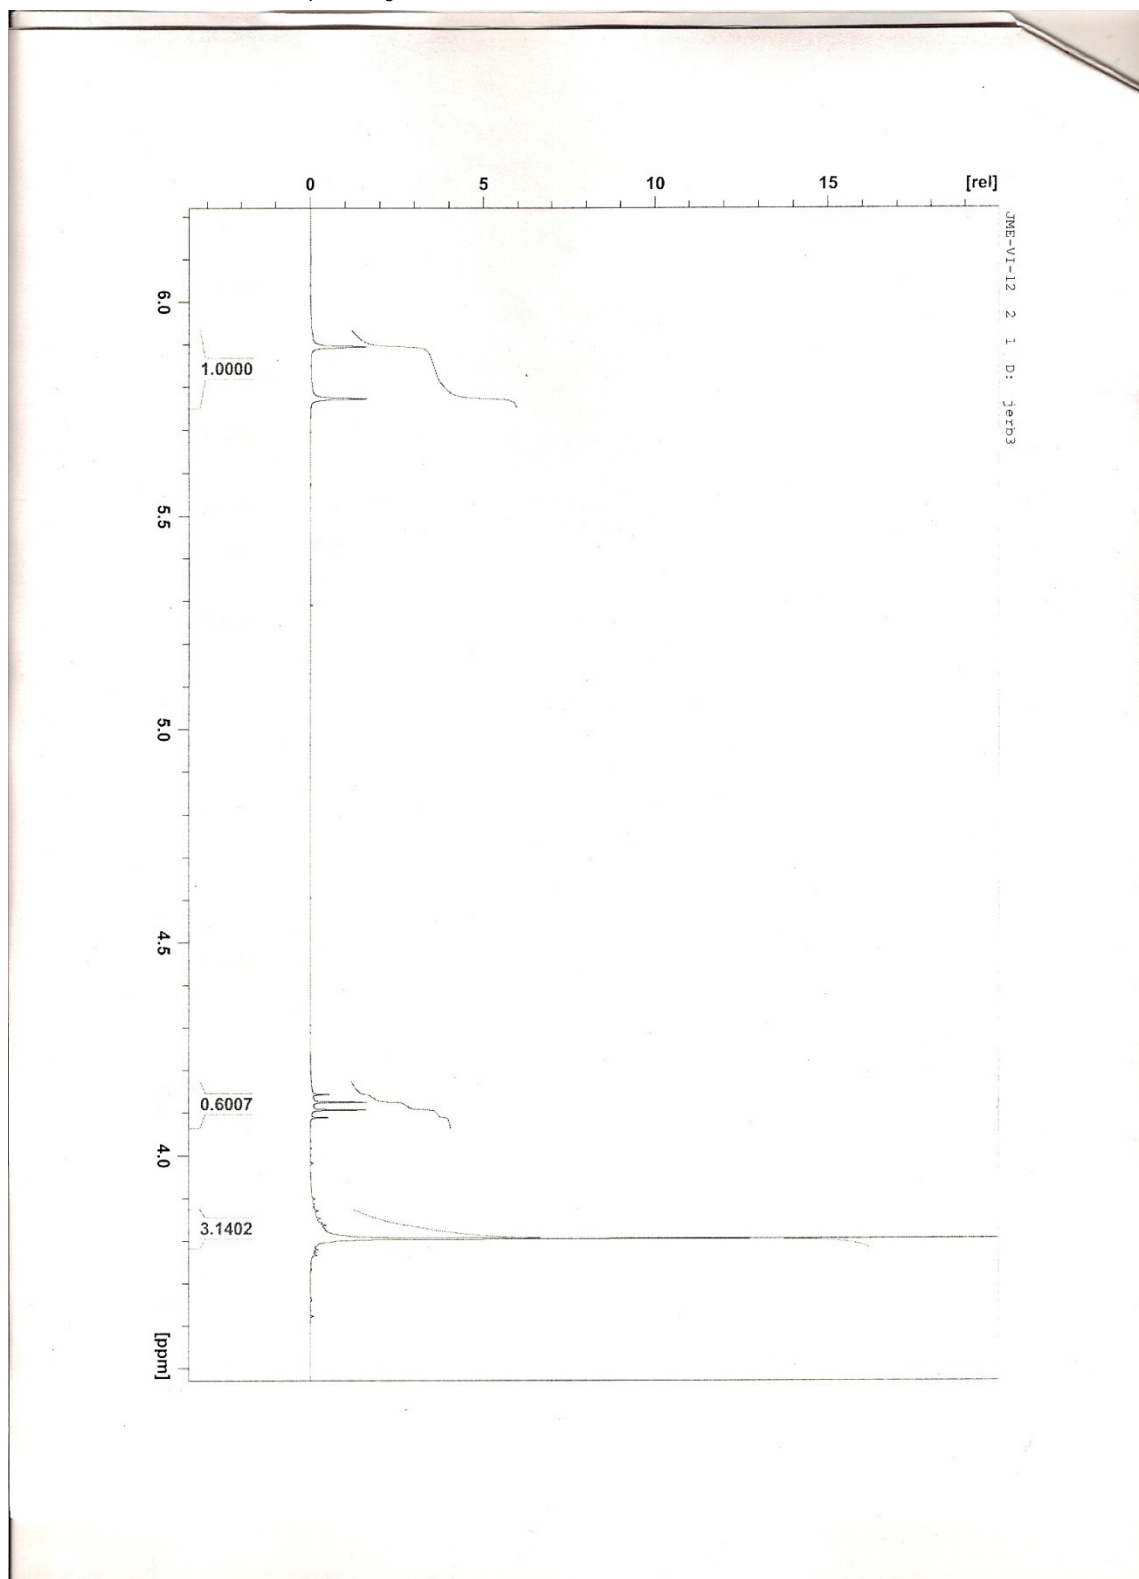

[SP: 3]

$^1\text{H}$  NMR for 3a – 400 MHz, C

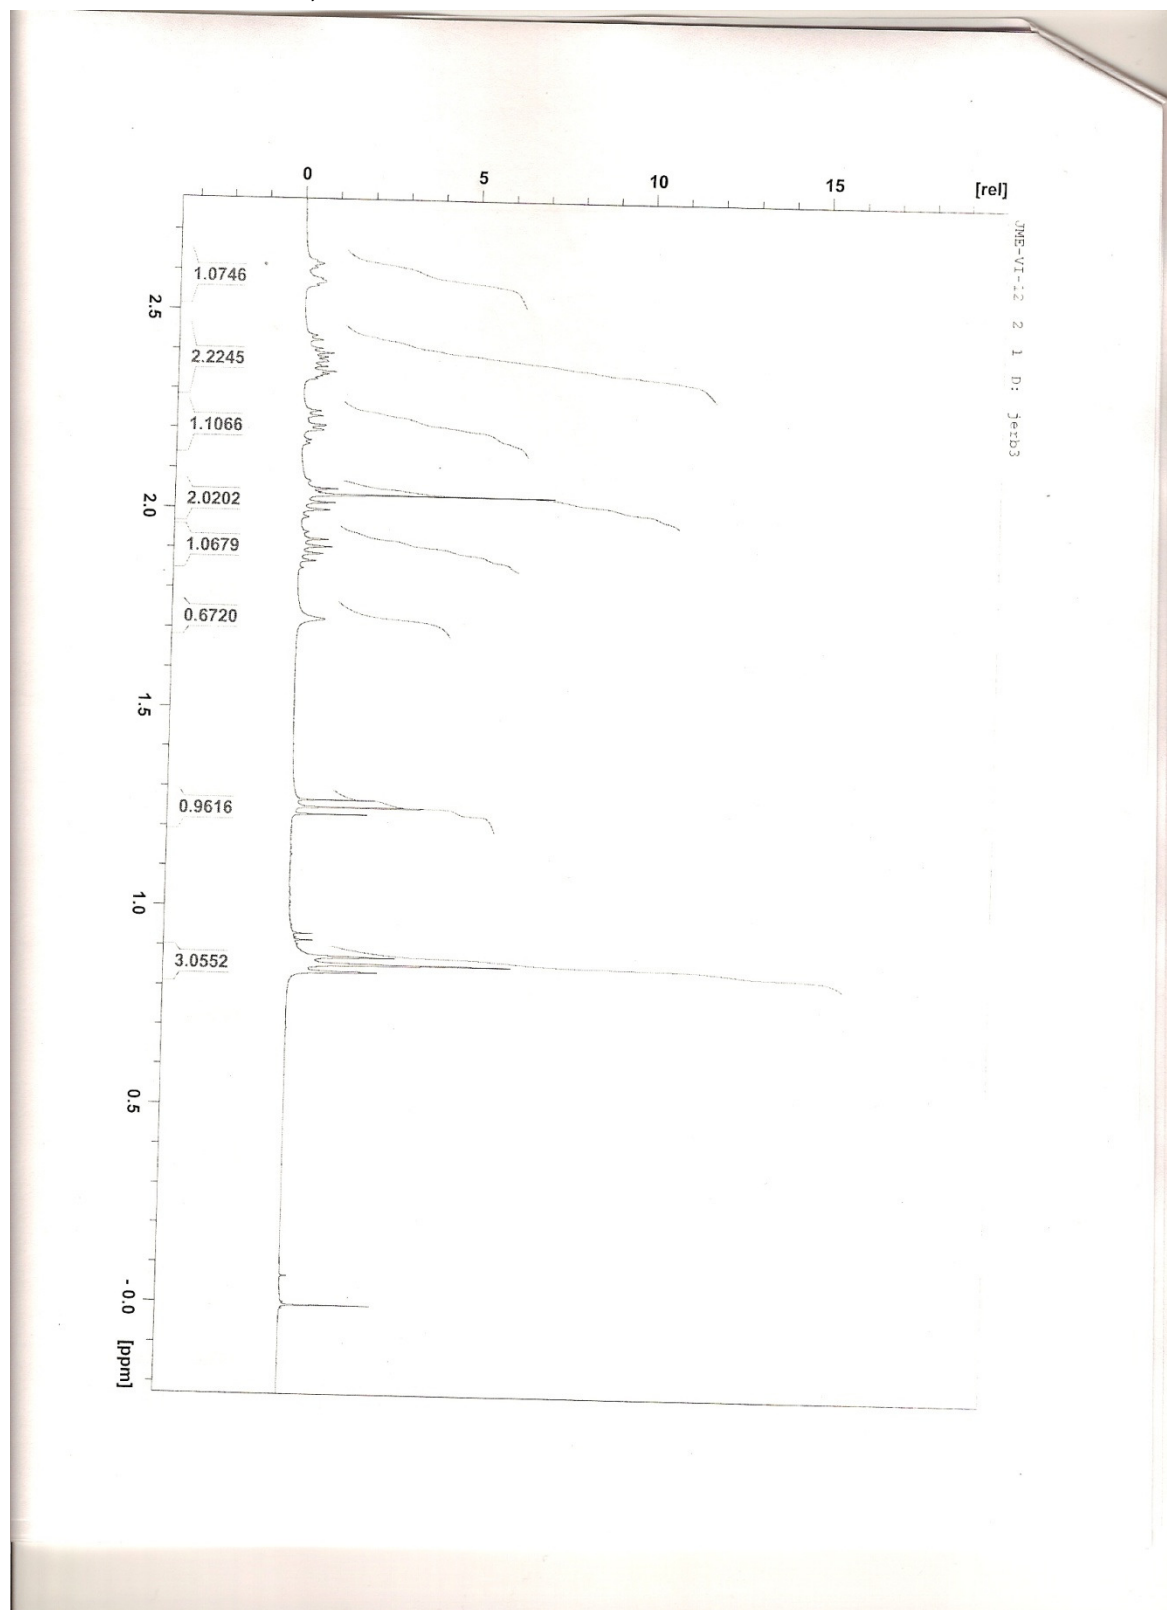

<sup>13</sup>C NMR for 3a – 400 MHz, CDCl<sub>3</sub>

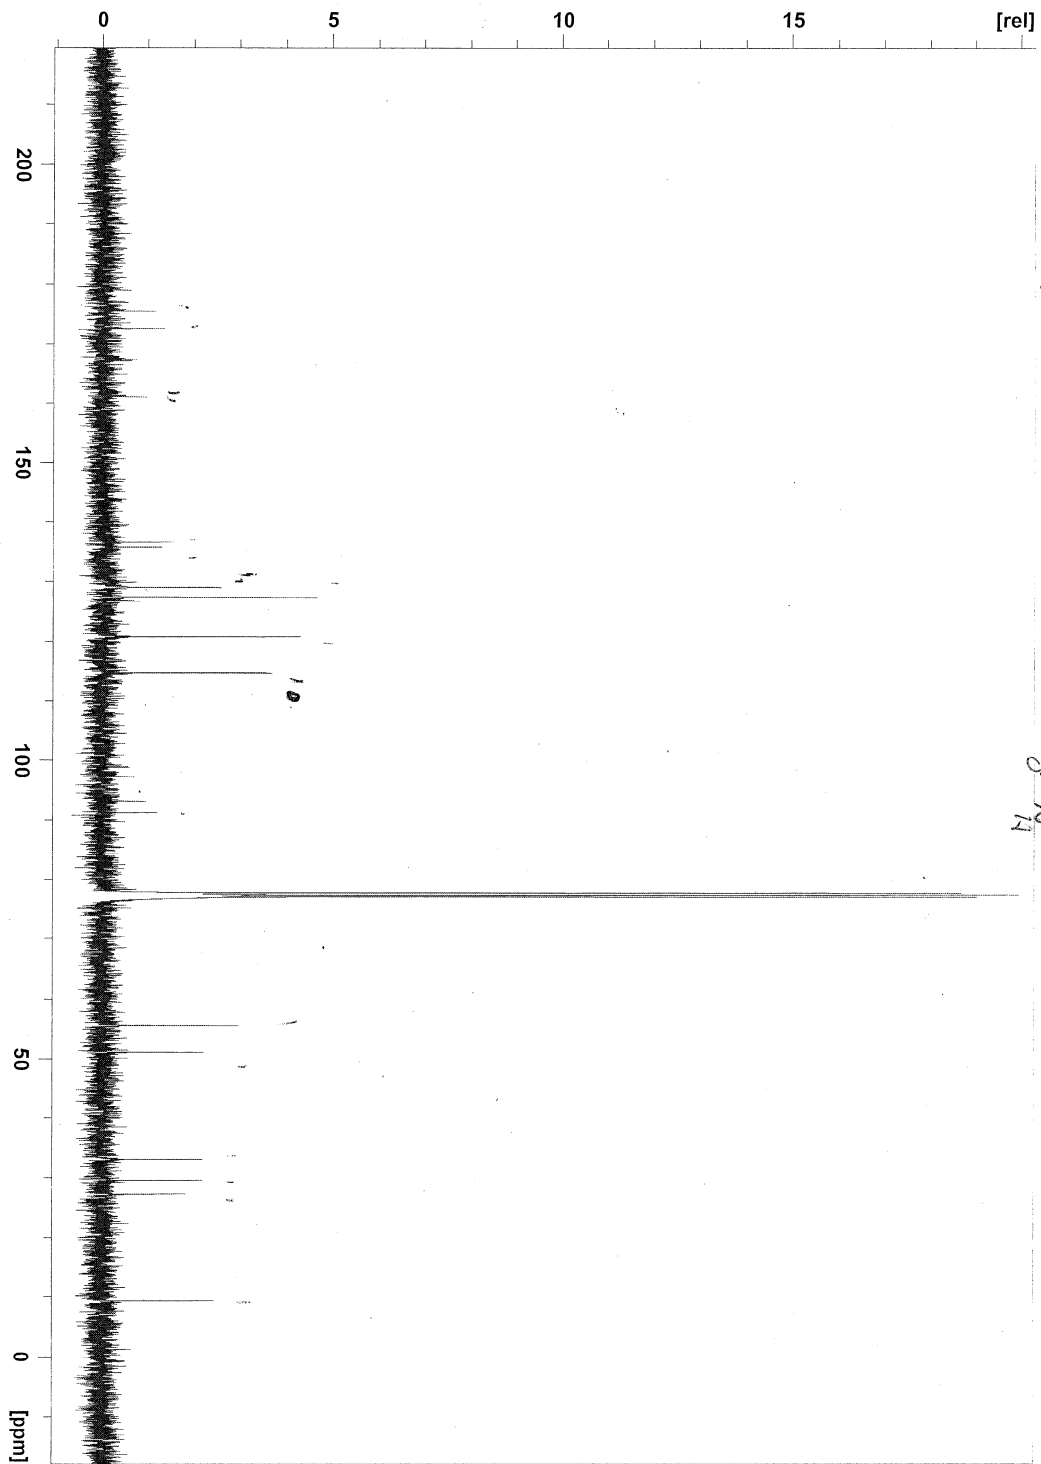

[SP: 5]

$^{19}\text{F}$  NMR for 3a – 300 MHz,  $\text{CDCl}_3$

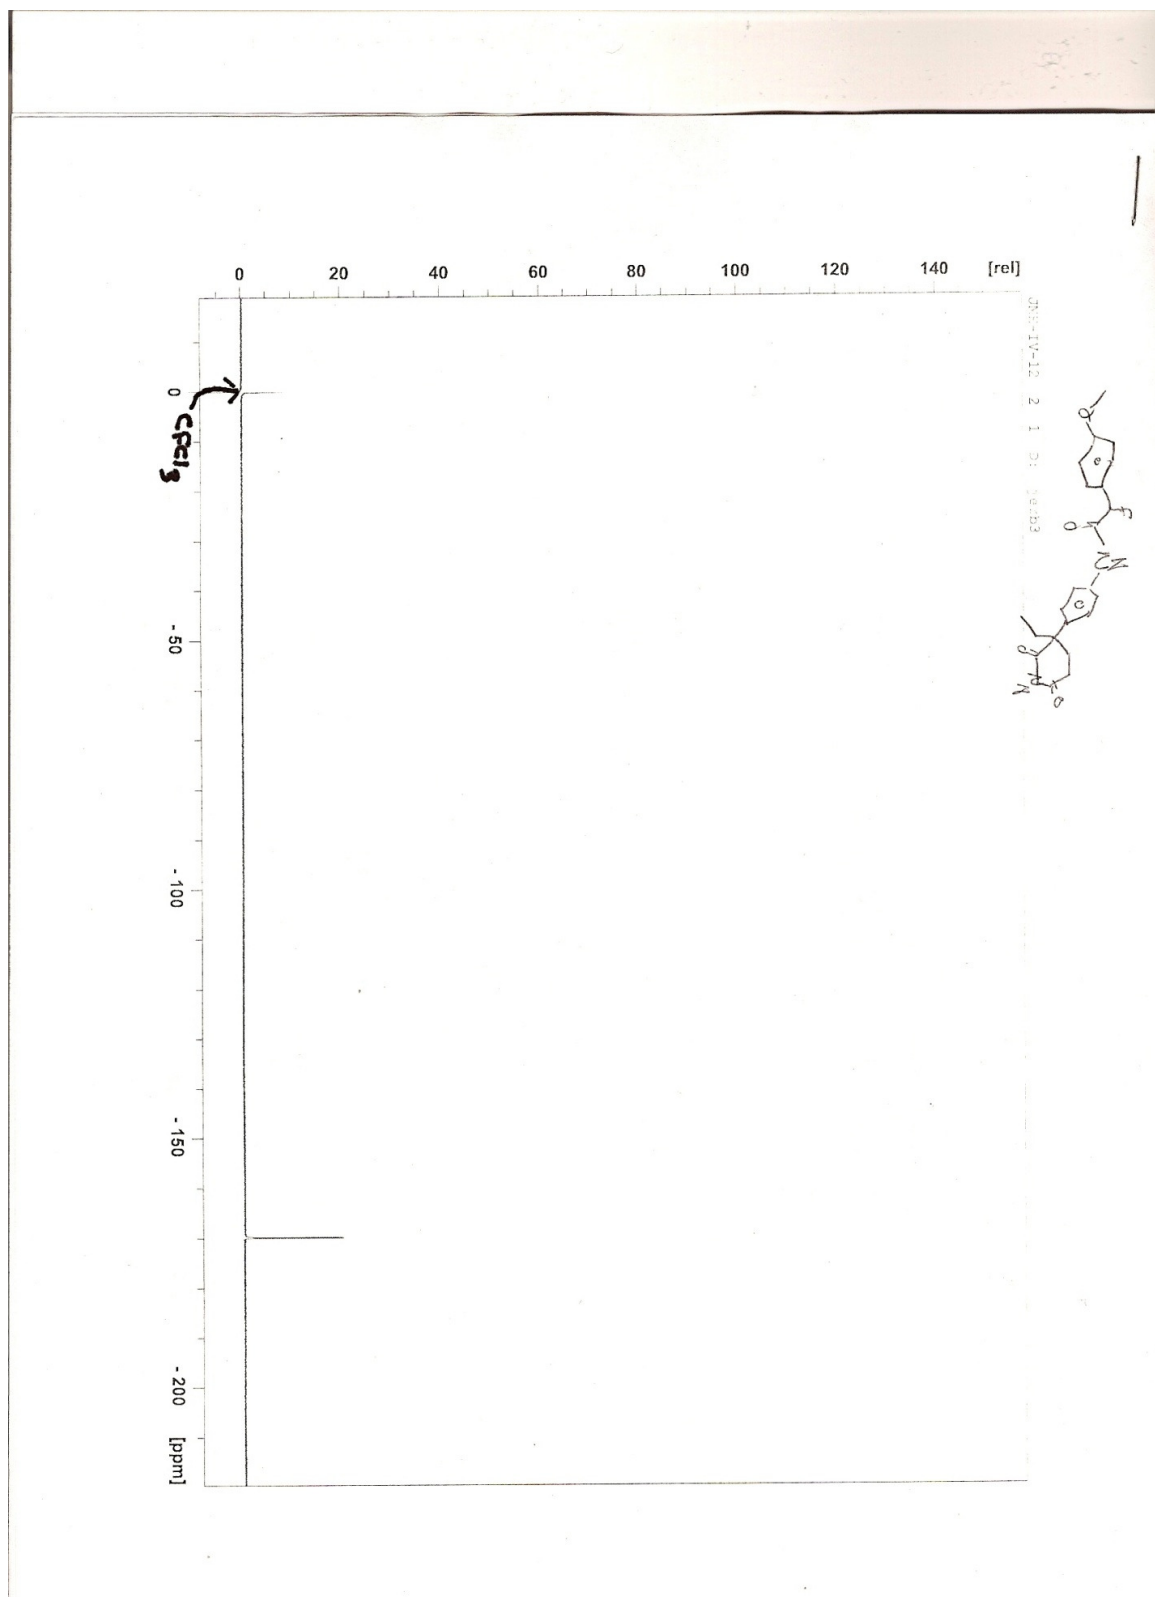

[SP: 6]

$^{19}\text{F}$  NMR for 3a – 400 MHz,  $\text{CDCl}_3$

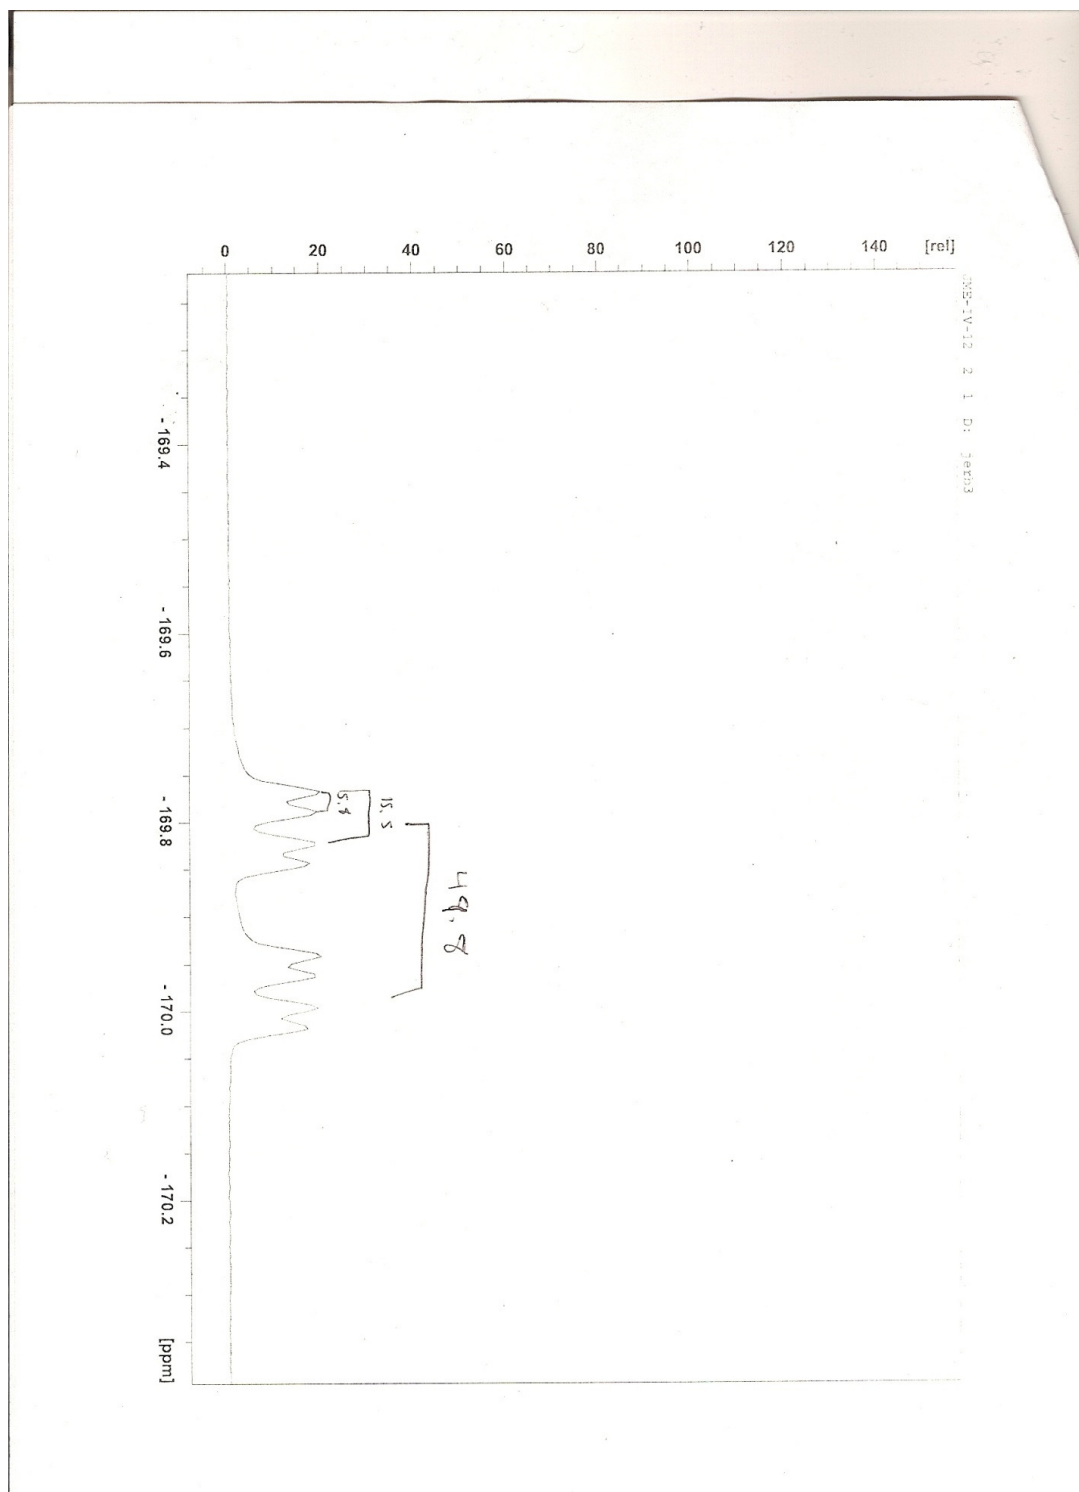

[SP: 7]

$^1\text{H}$  NMR for 3b – 400 MHz,  $\text{CDCl}_3$

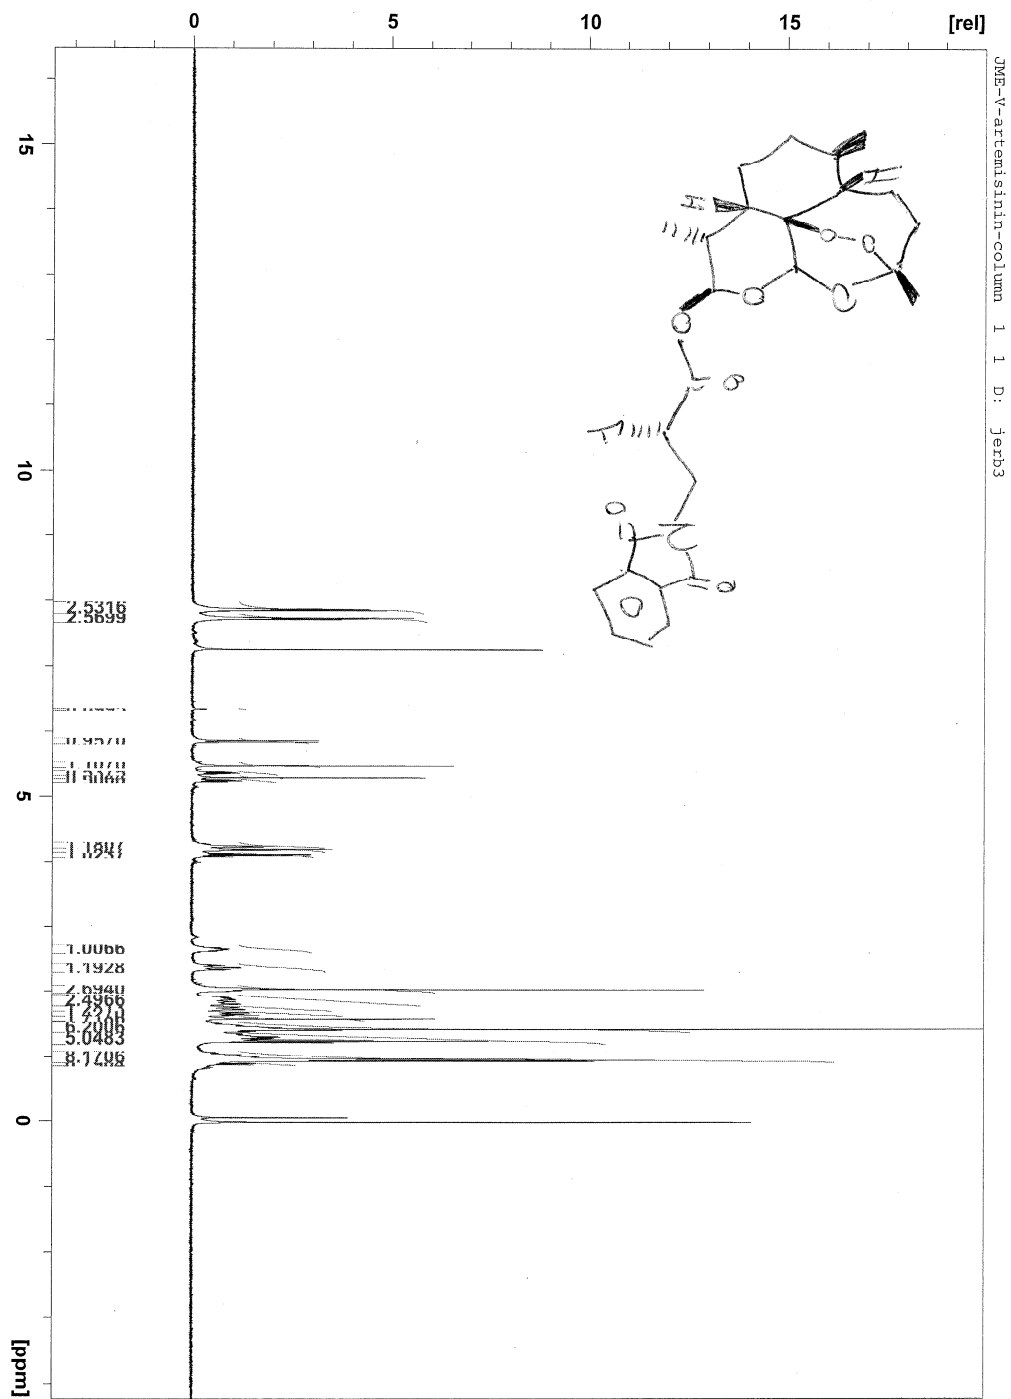



$^1\text{H}$  NMR for 3b – 400 MHz,  $\text{CDCl}_3$

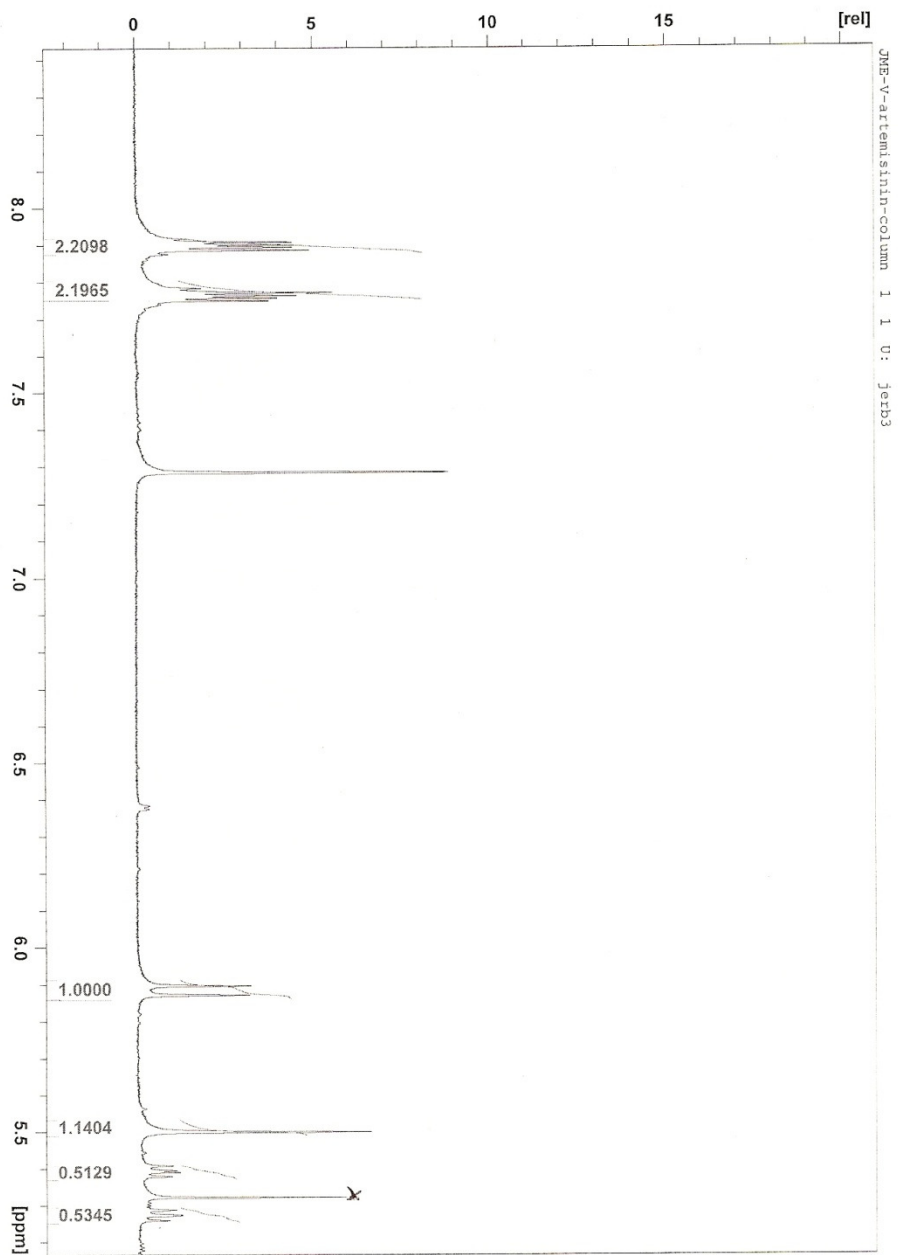

$^1\text{H}$  NMR for 3b – 400 MHz,  $\text{CDCl}_3$

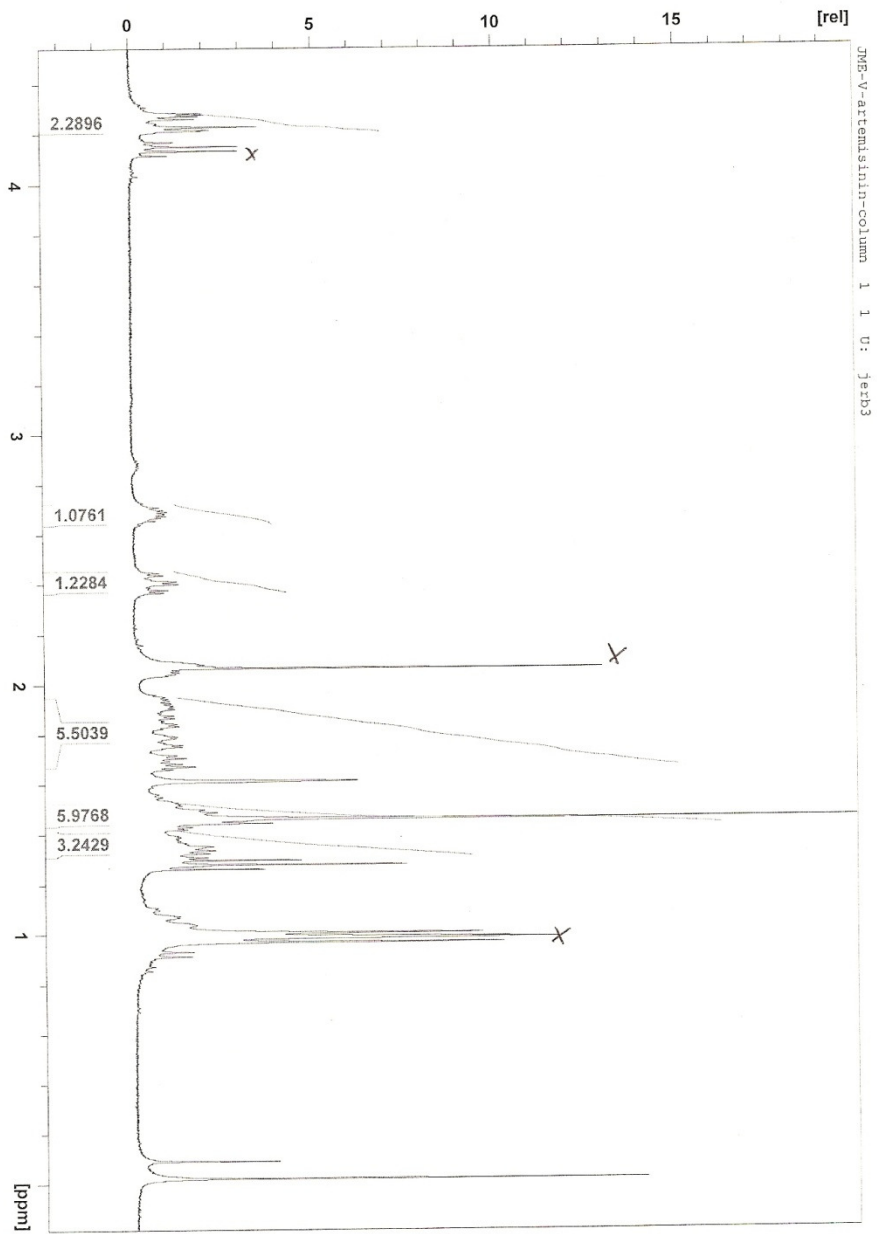

$^{13}\text{C}$  NMR for 3b – 400 MHz,  $\text{CDCl}_3$

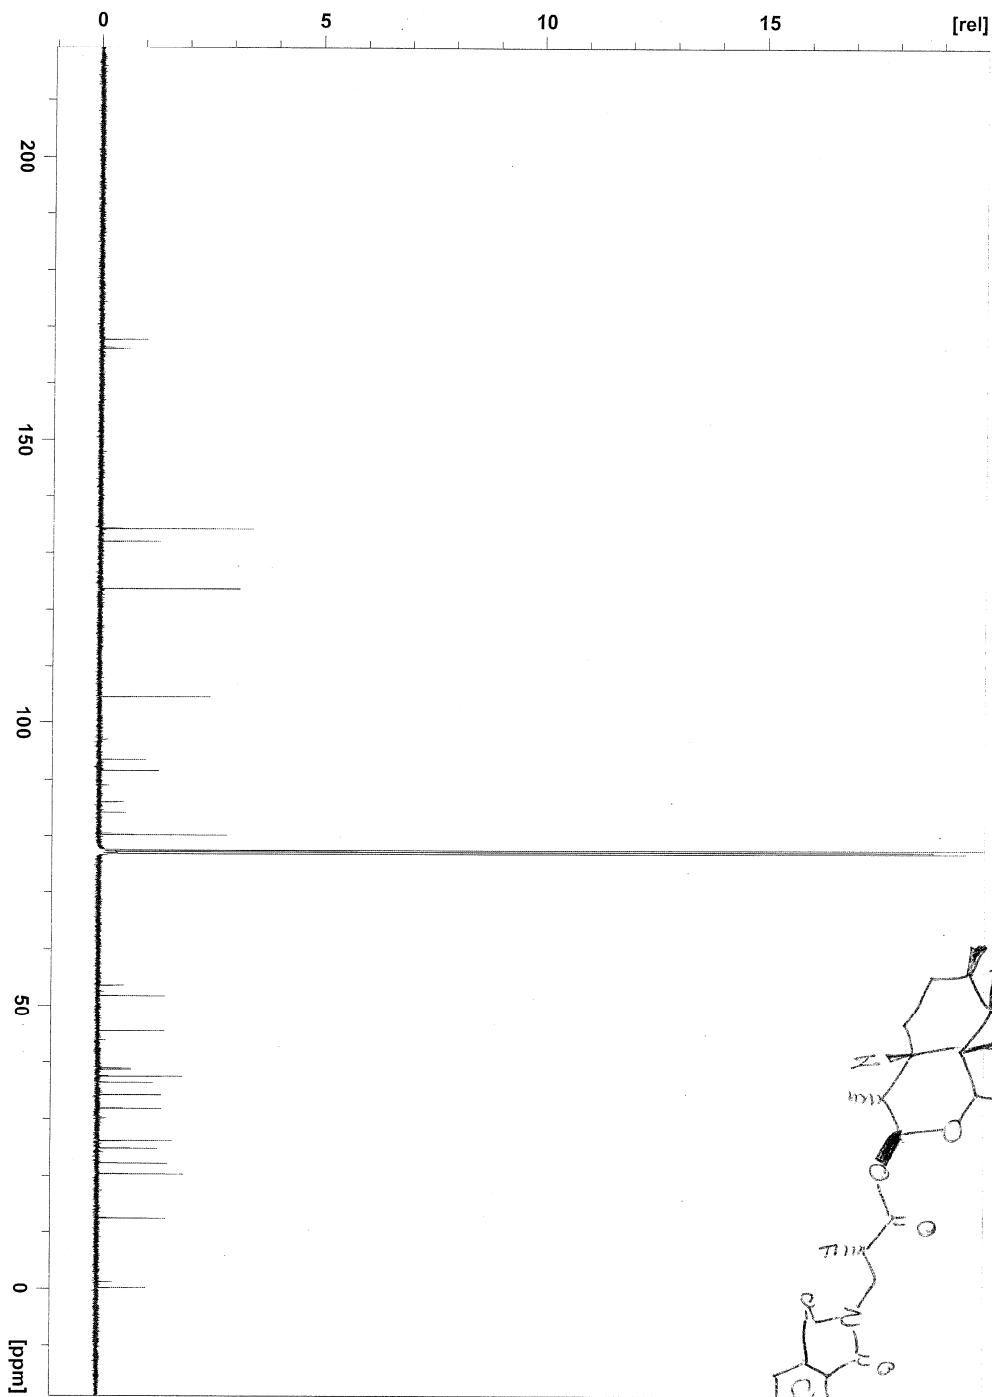

$^{19}\text{F}$  NMR for 3b – 300 MHz,  $\text{CDCl}_3$

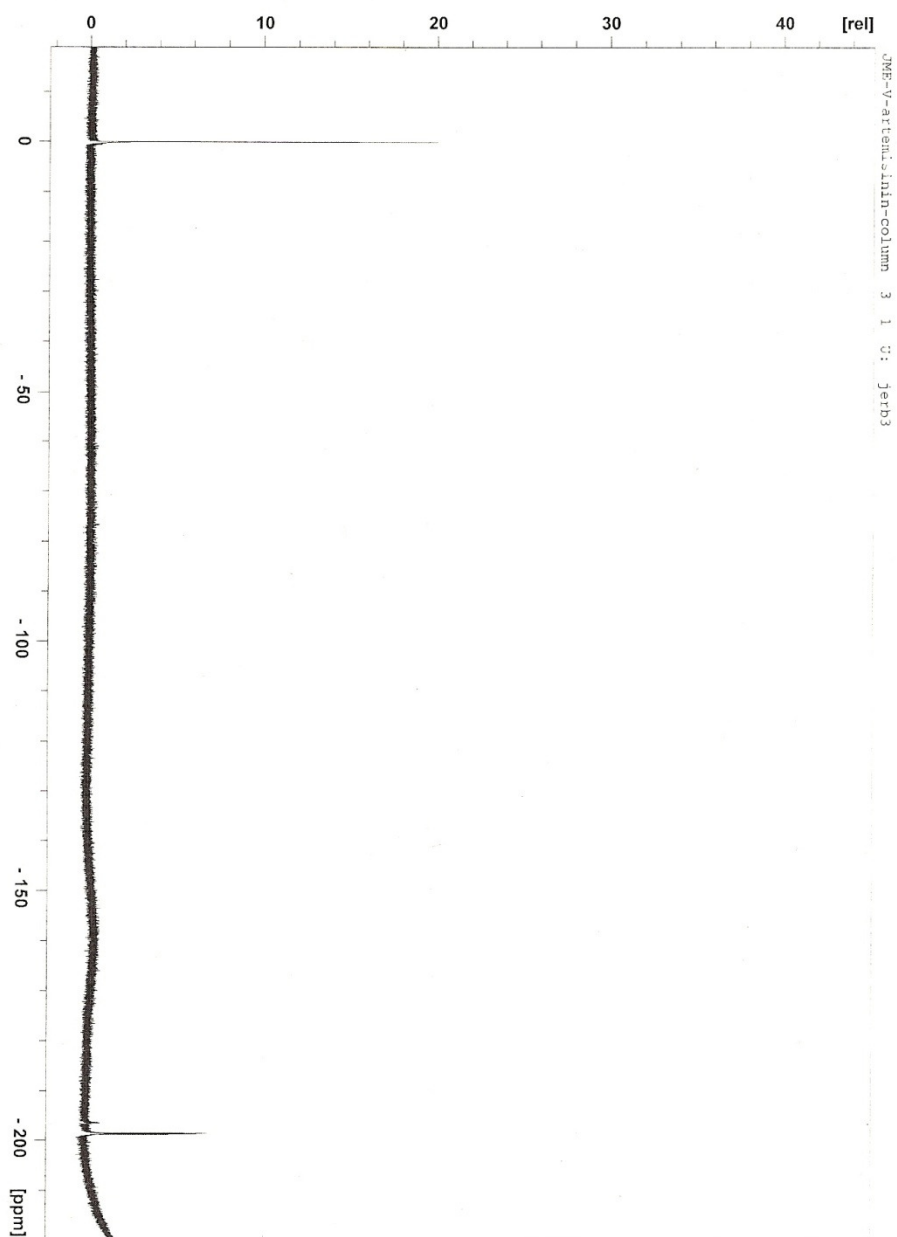

[SP: 12]

<sup>19</sup>F NMR for 3b – 300 MHz, CDCl<sub>3</sub>

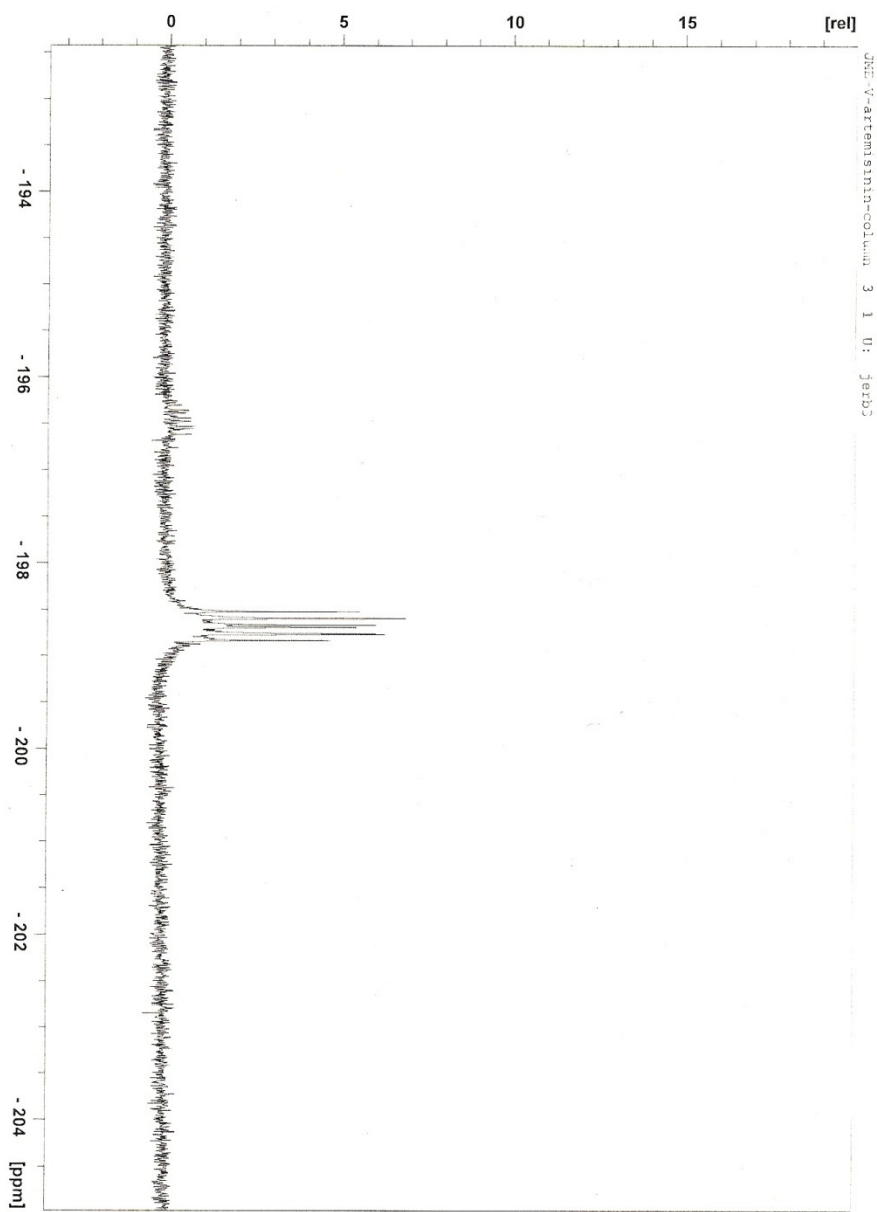

$^1\text{H}$  NMR for 3c – 400 MHz,  $\text{DMSO-D}_6$

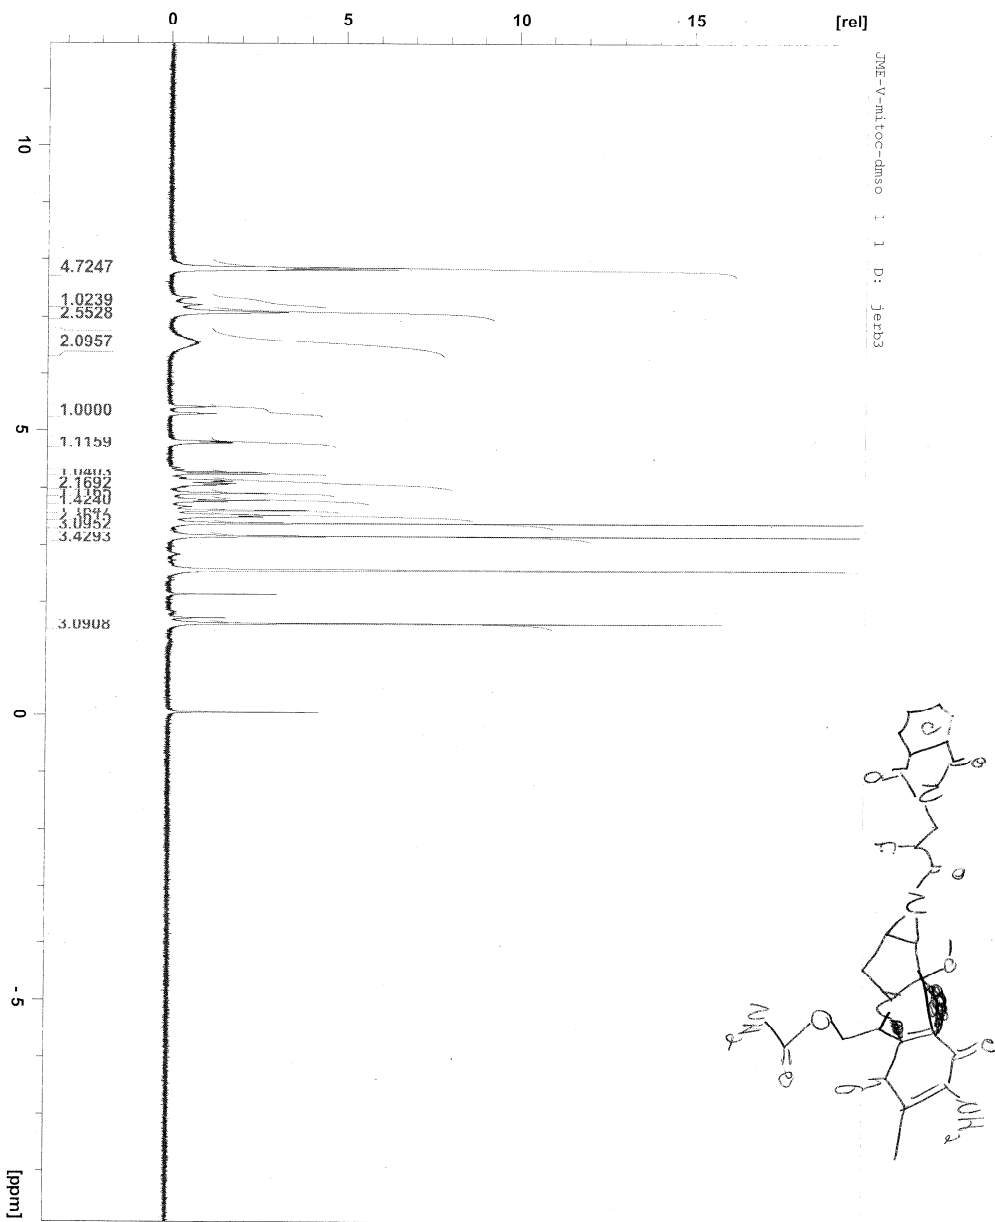

$^1\text{H}$  NMR for 3c – 400 MHz,  $\text{DMSO-D}_6$

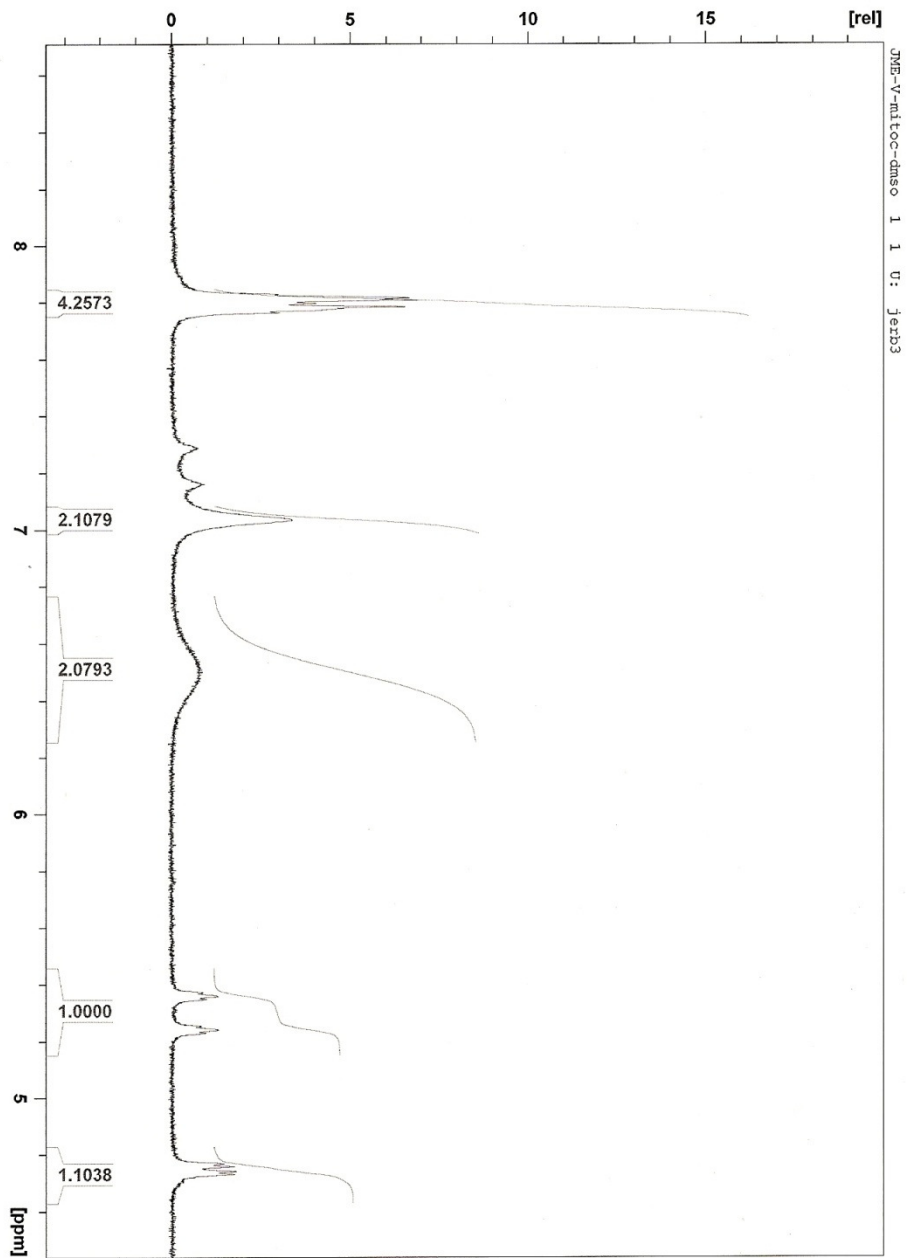

$^1\text{H}$  NMR for 3c – 400 MHz,  $\text{DMSO-D}_6$

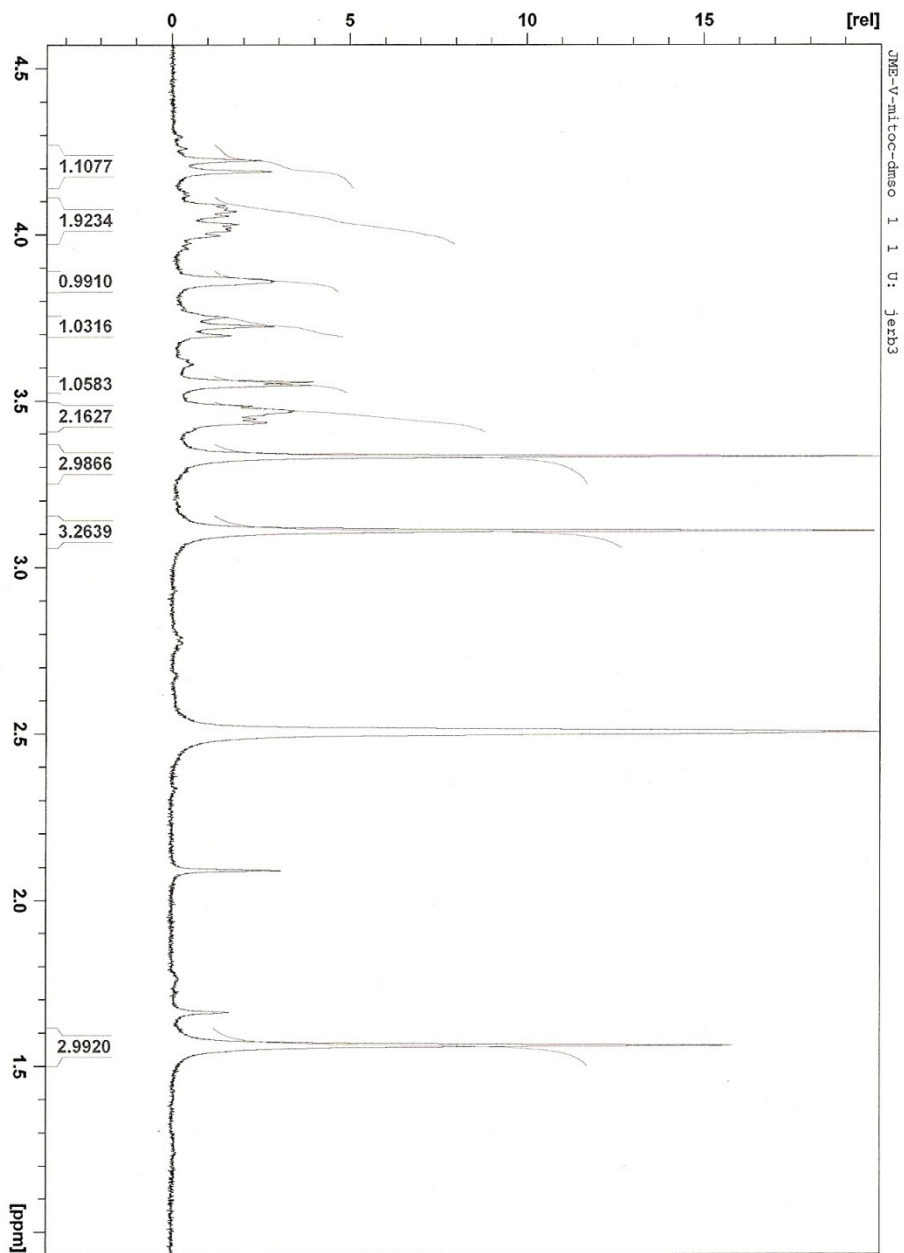



<sup>13</sup>C NMR for 3c – 400 MHz, DMSO-D<sub>6</sub>

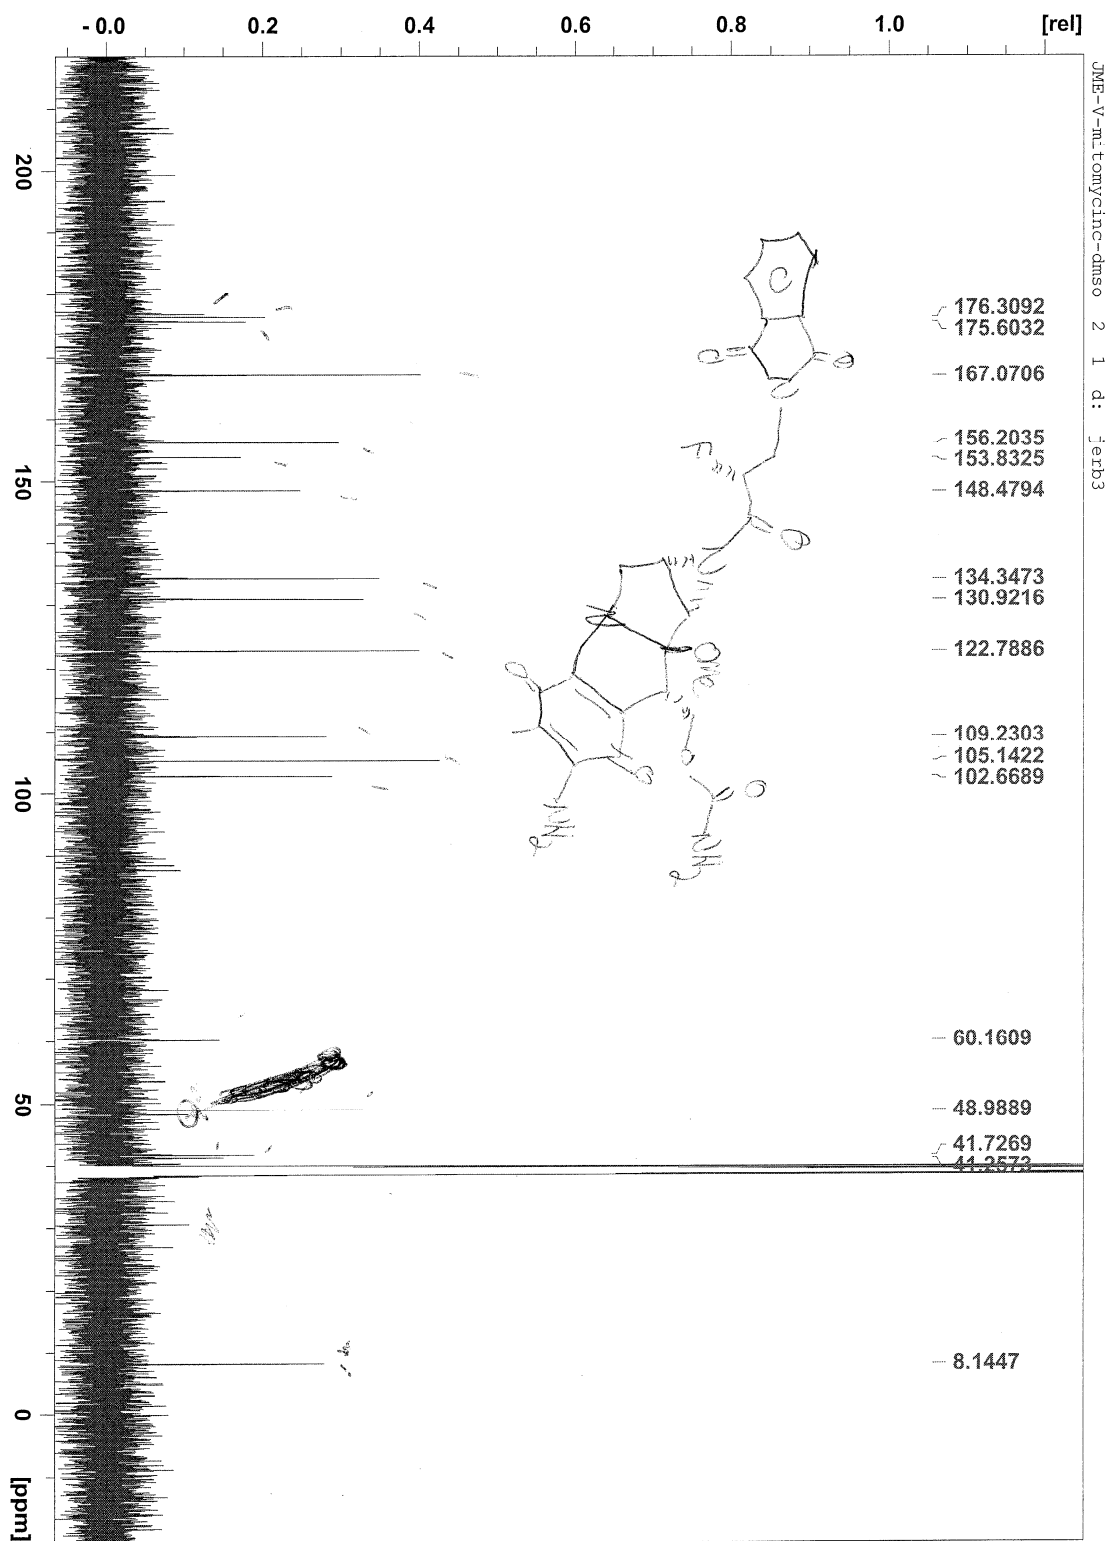

$^{19}\text{F}$  NMR for 3c – 300 MHz, DMSO- $\text{D}_6$

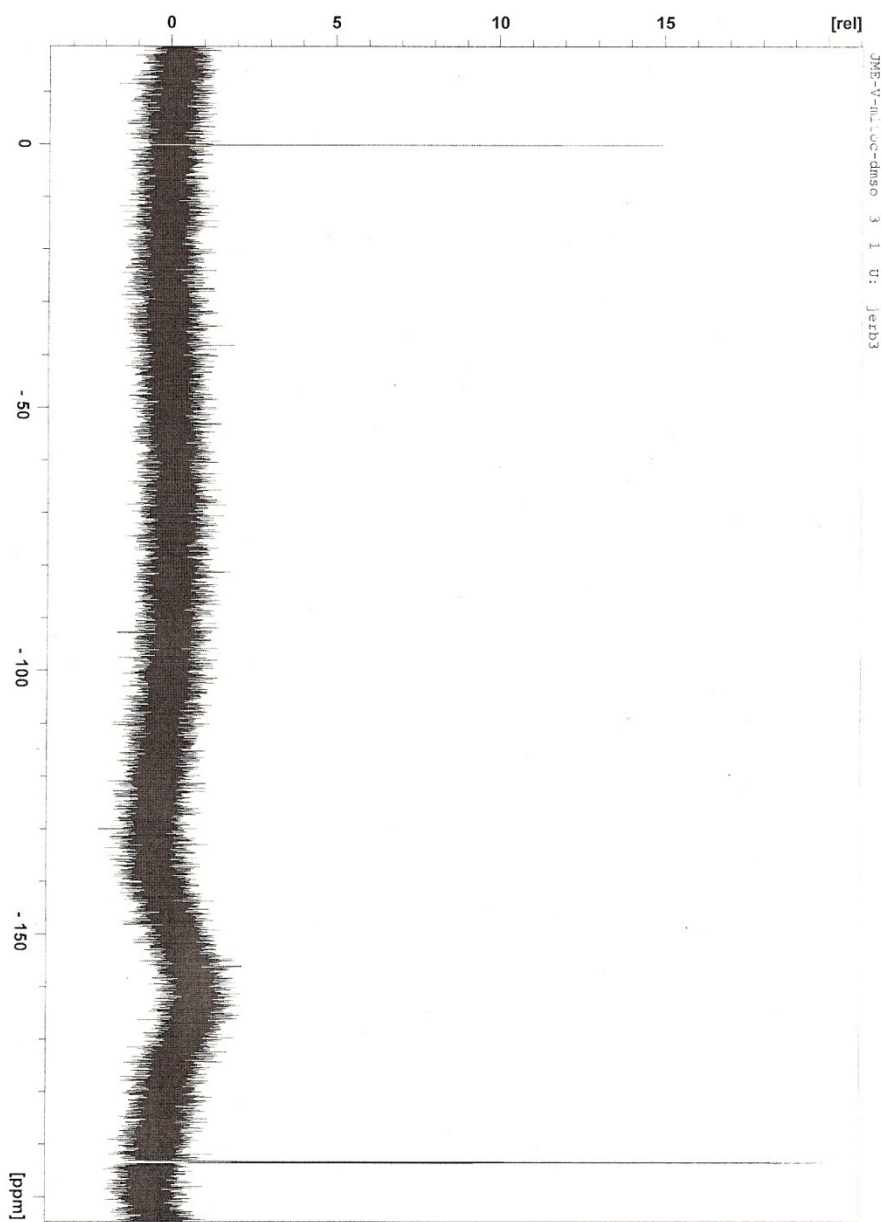

$^{19}\text{F}$  NMR for 3c – 300 MHz,  $\text{DMSO-D}_6$

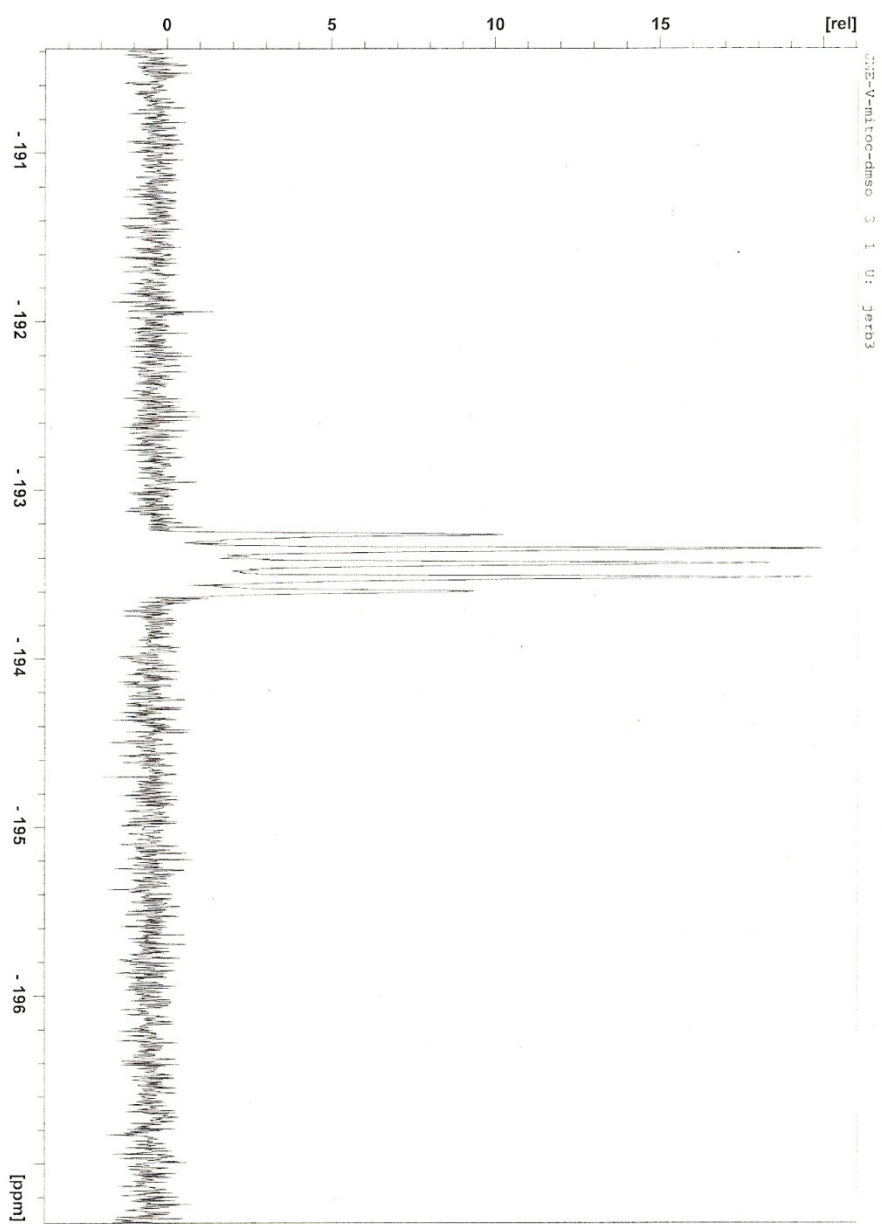

$^1\text{H}$  NMR for 3d – 400 MHz,  $\text{CDCl}_3$

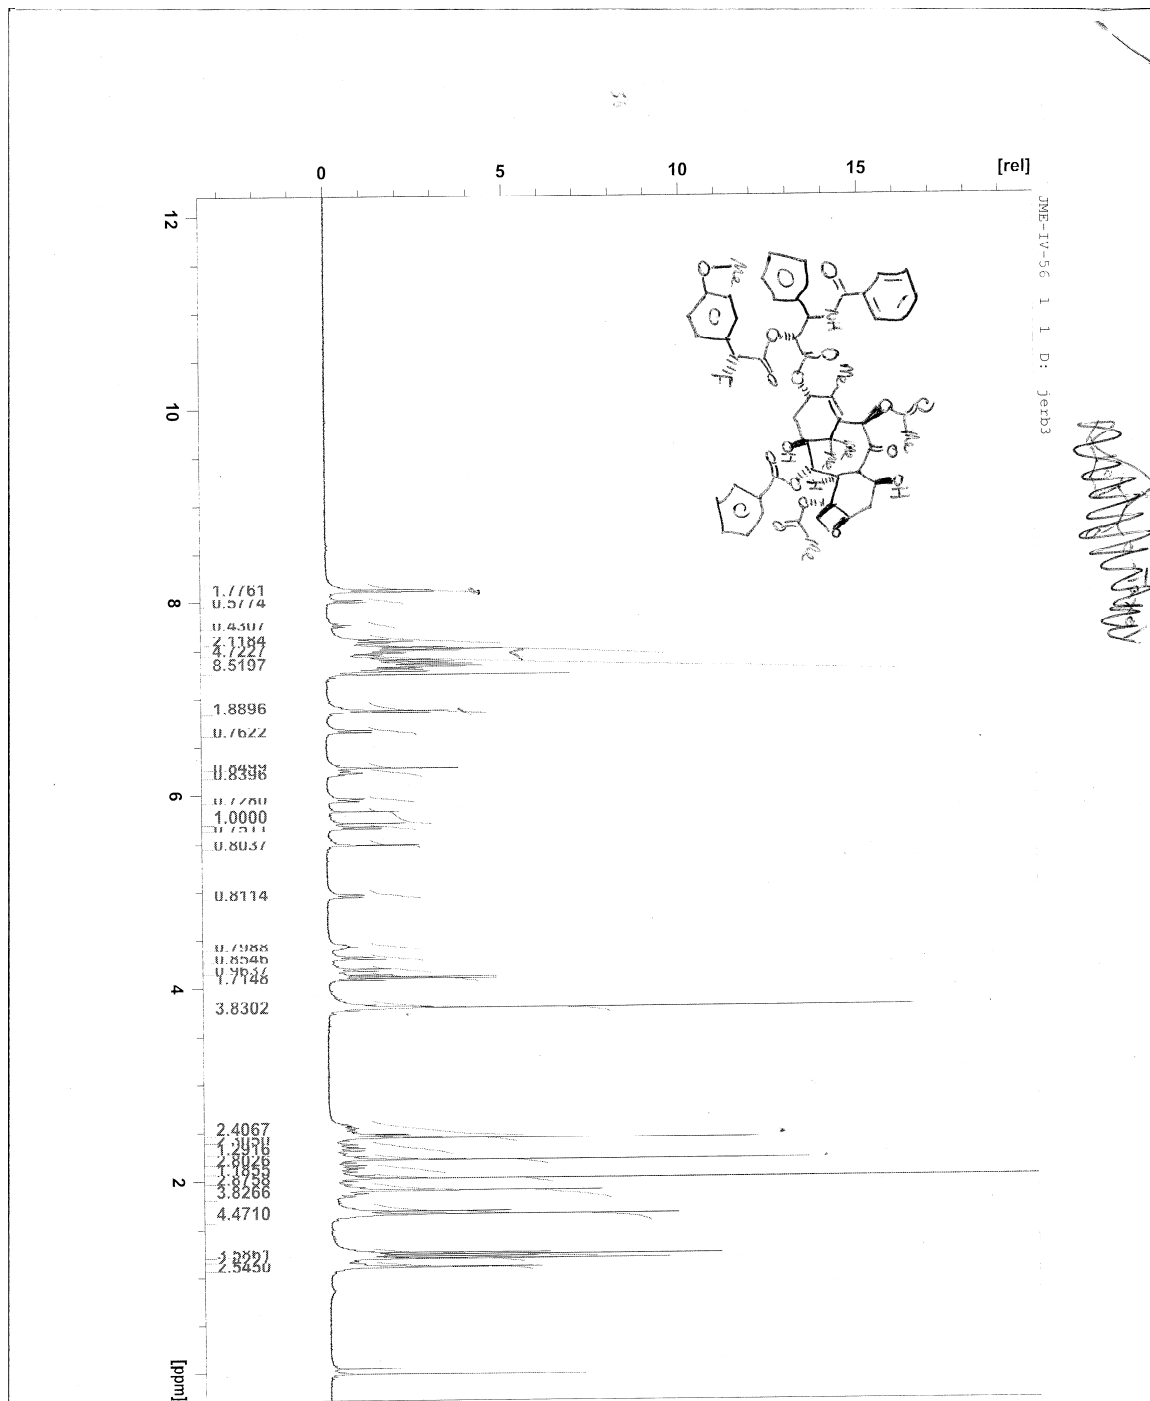

$^1\text{H}$  NMR for 3d – 400 MHz,  $\text{CDCl}_3$

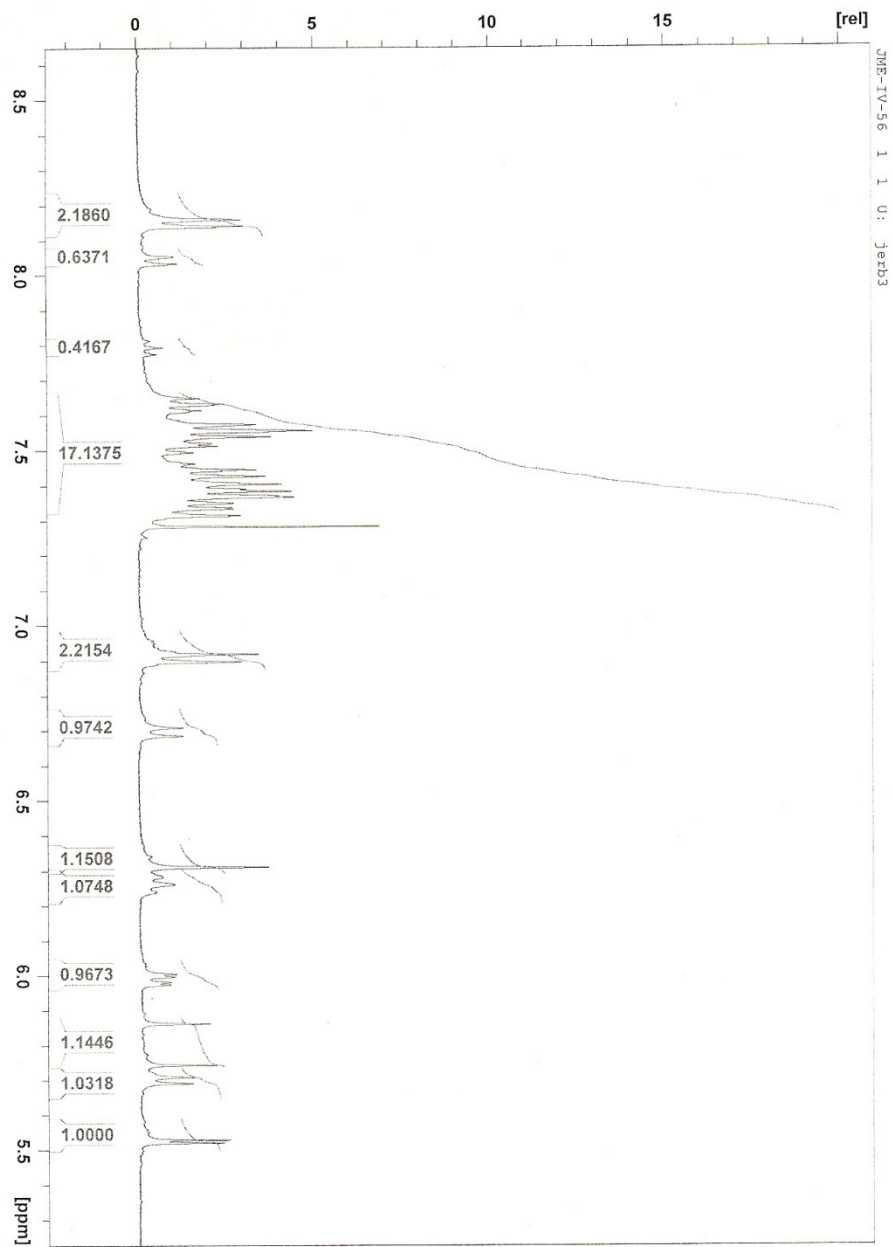

$^1\text{H}$  NMR for 3d – 400 MHz,  $\text{CDCl}_3$

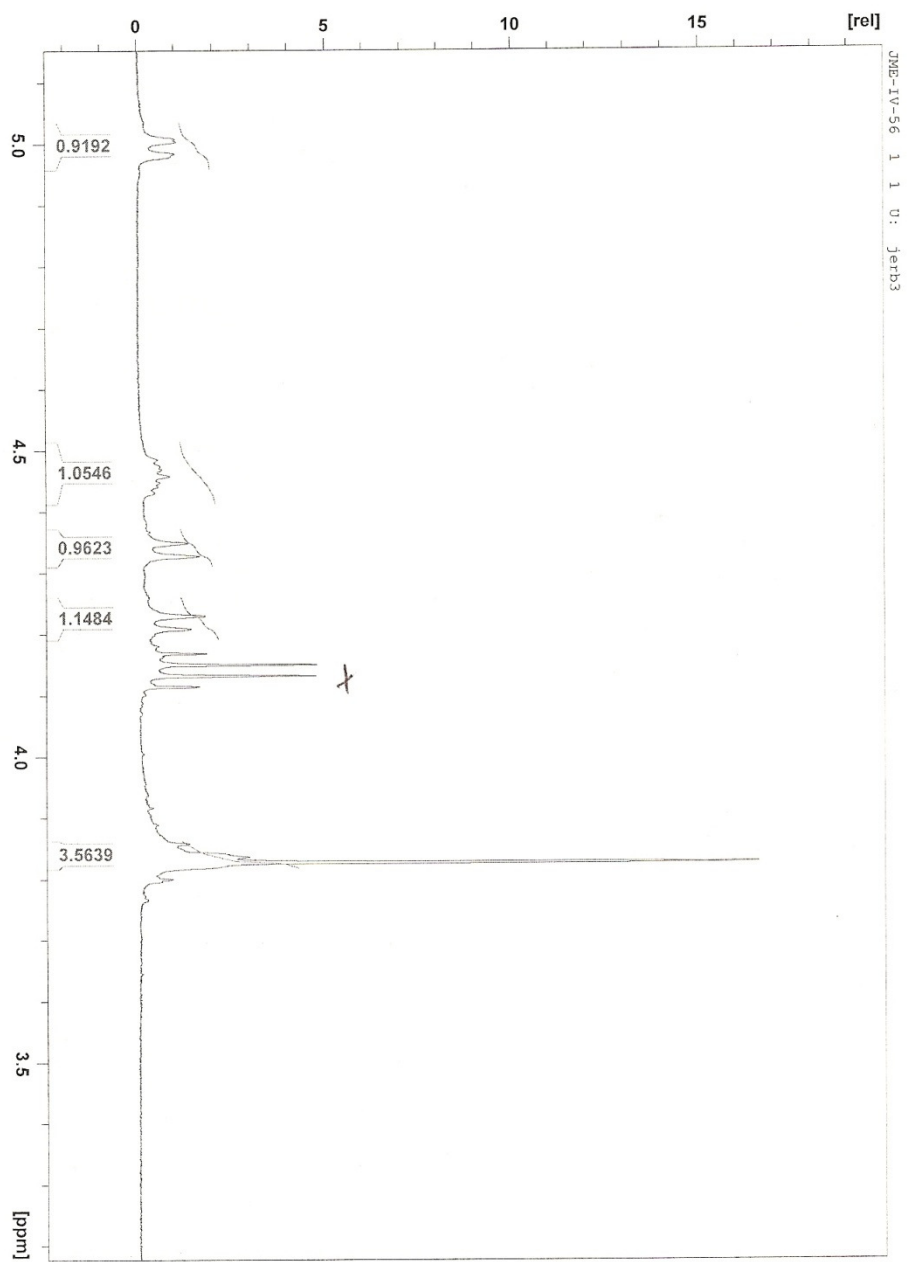

$^1\text{H}$  NMR for 3d – 400 MHz,  $\text{CDCl}_3$

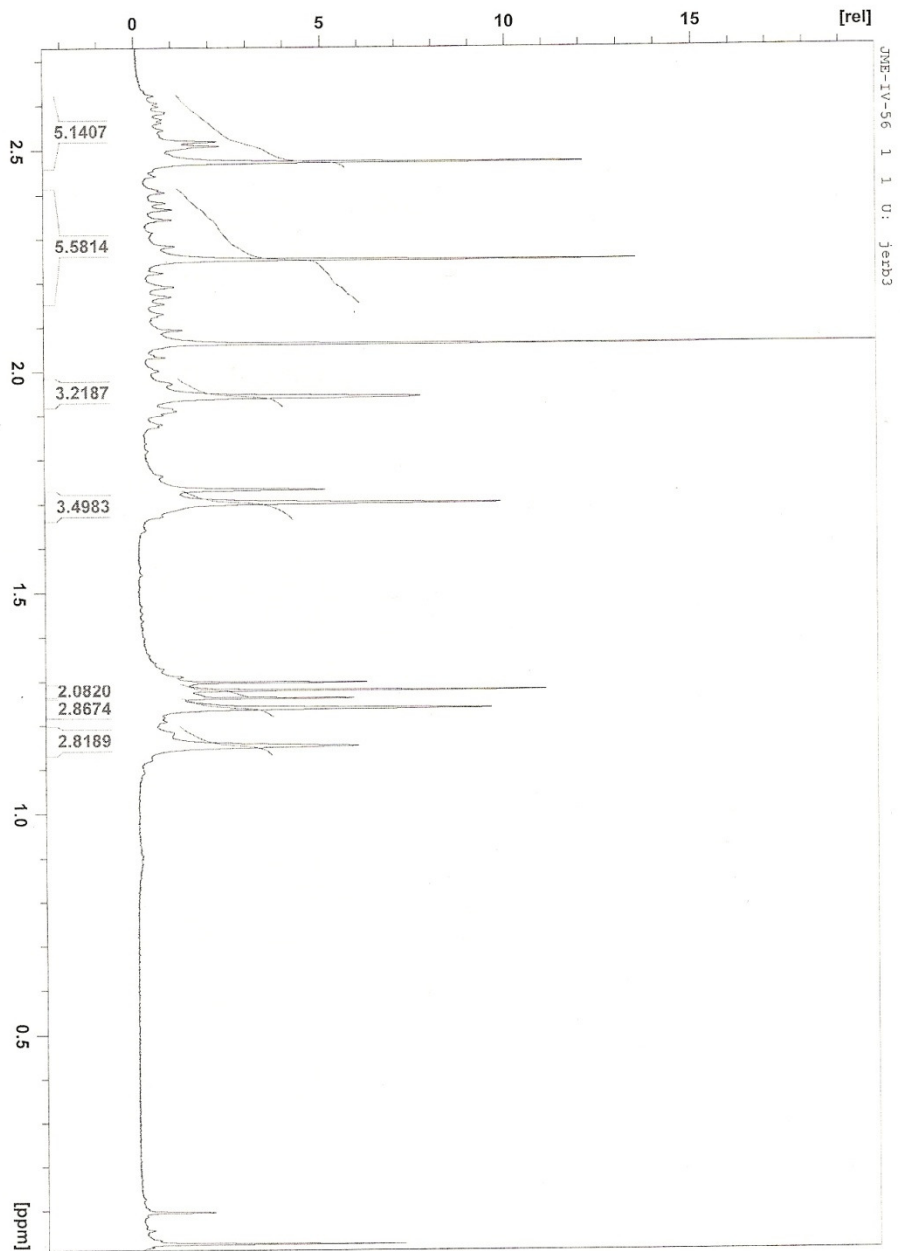

<sup>13</sup>C NMR for 3d – 400 MHz, CDCl<sub>3</sub>

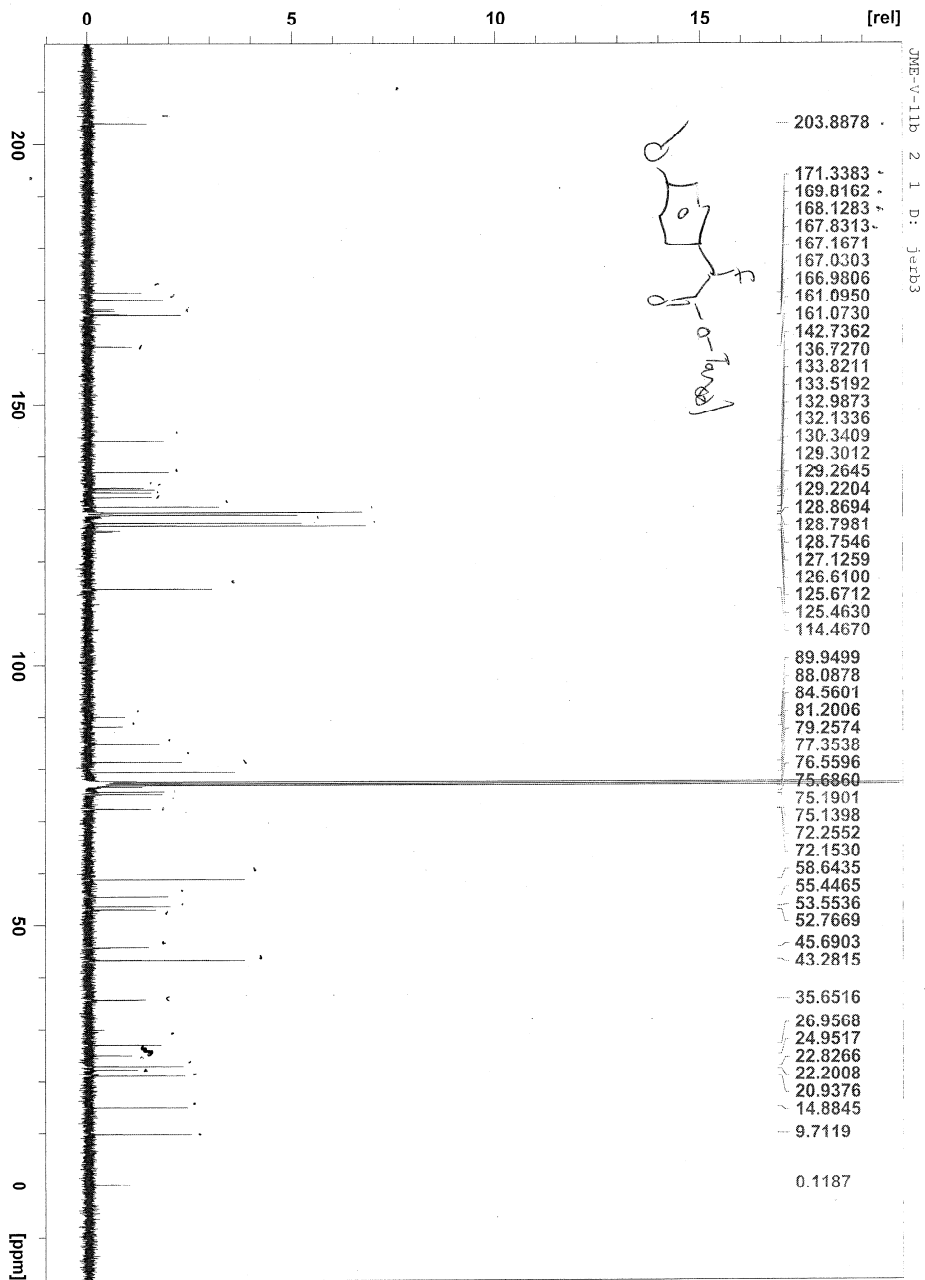



$^{19}\text{F}$  NMR for 3d – 300 MHz,  $\text{CDCl}_3$

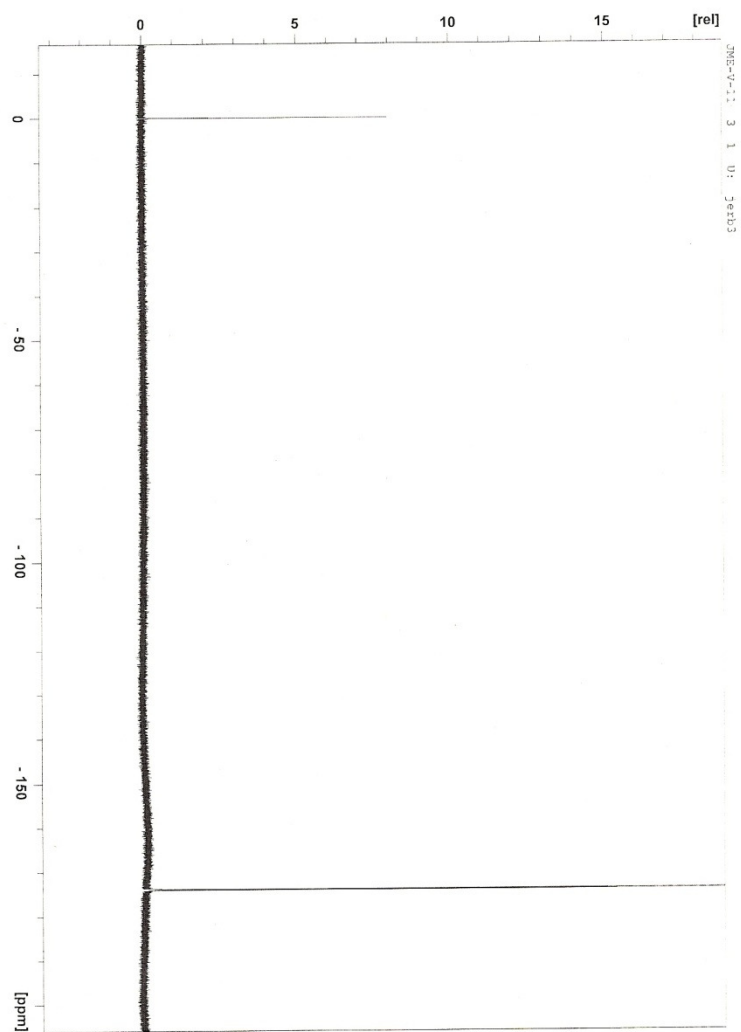

$^{19}\text{F}$  NMR for 3d – 300 MHz,  $\text{CDCl}_3$

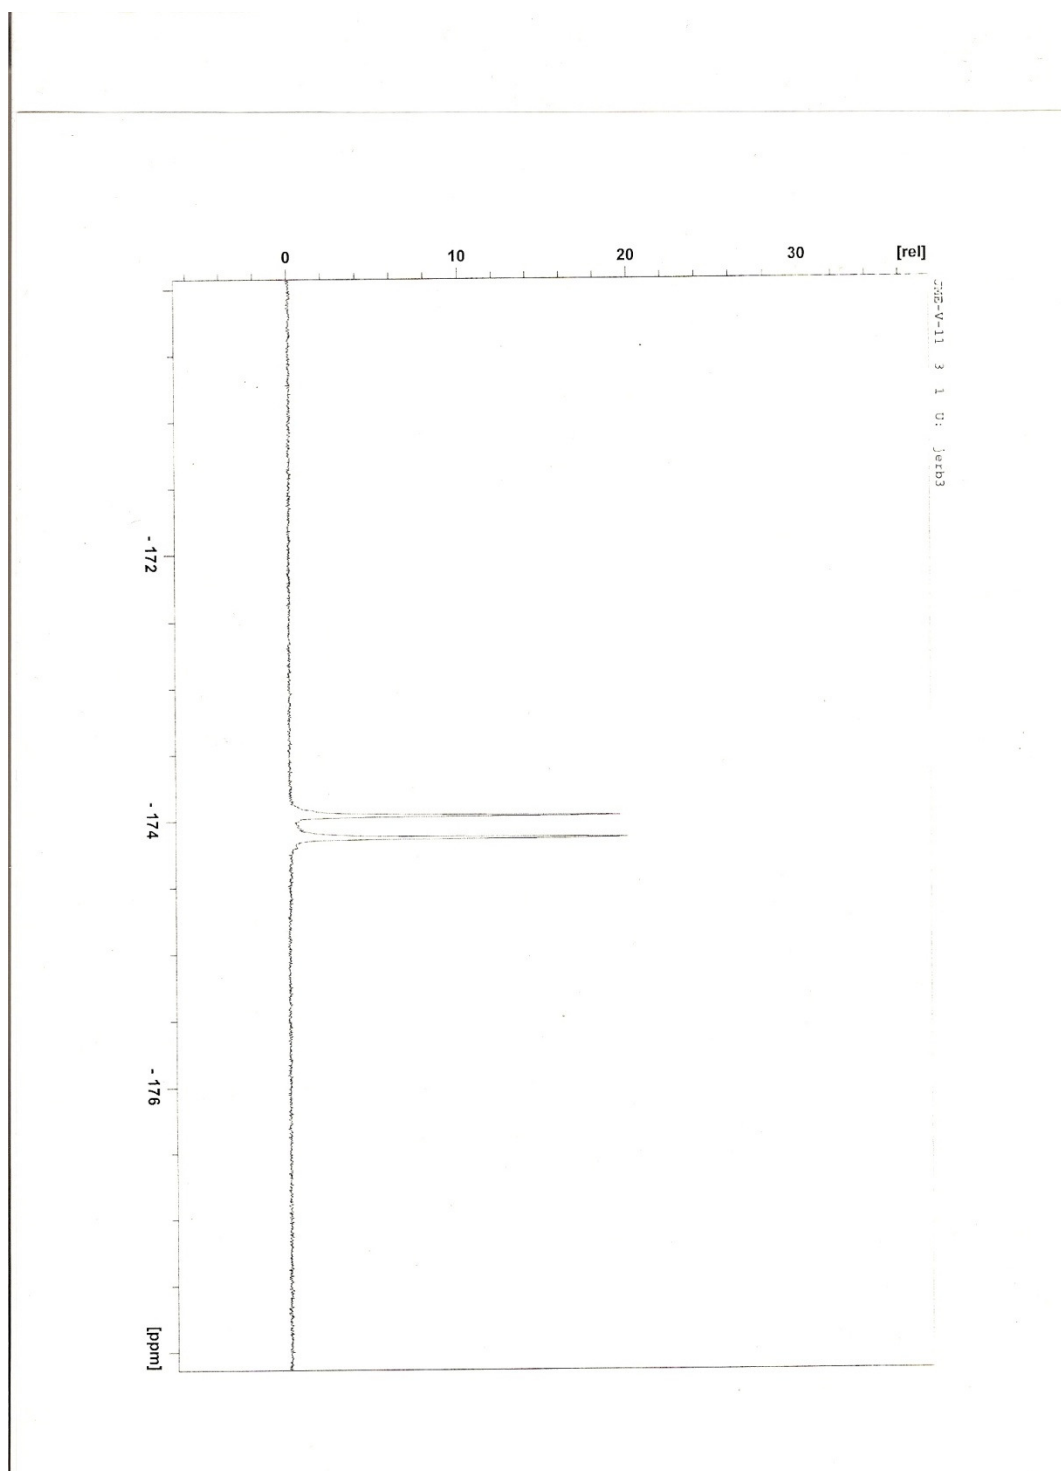

$^1\text{H}$  NMR for 3e – 400 MHz,  $\text{CDCl}_3$

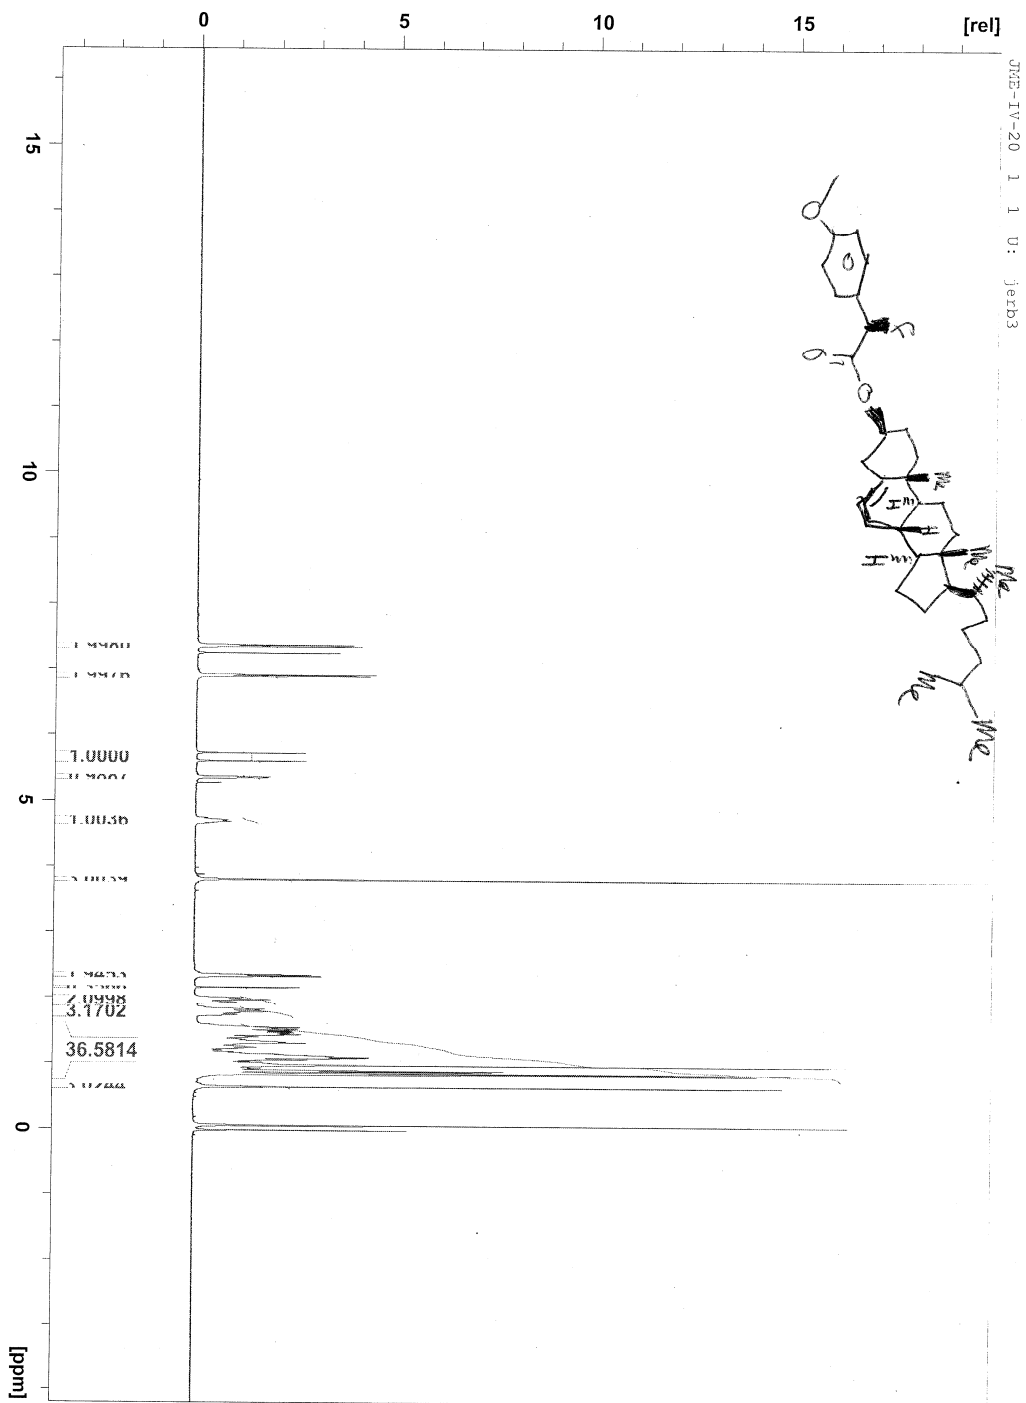

$^1\text{H}$  NMR for 3e – 400 MHz,  $\text{CDCl}_3$

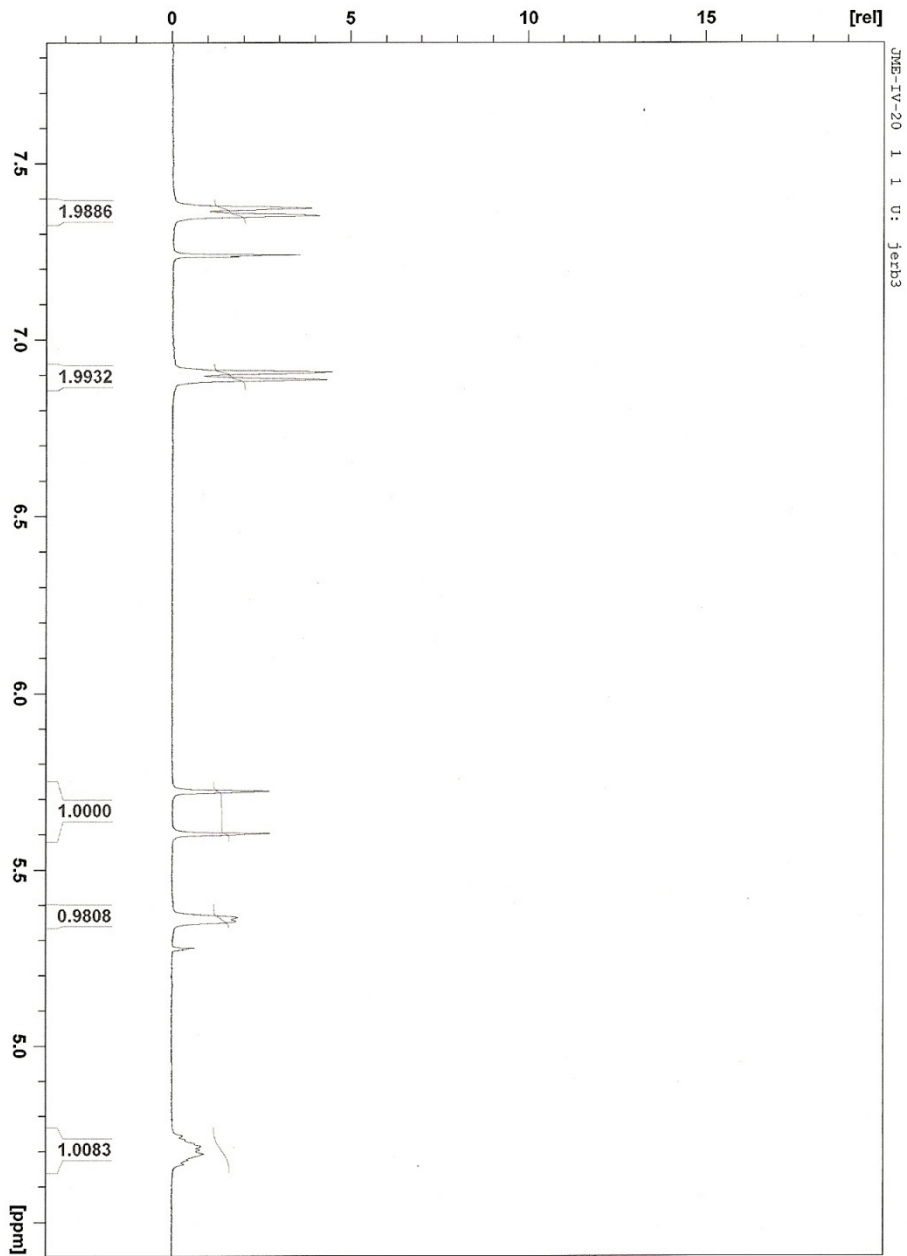

$^1\text{H}$  NMR for 3e – 400 MHz,  $\text{CDCl}_3$

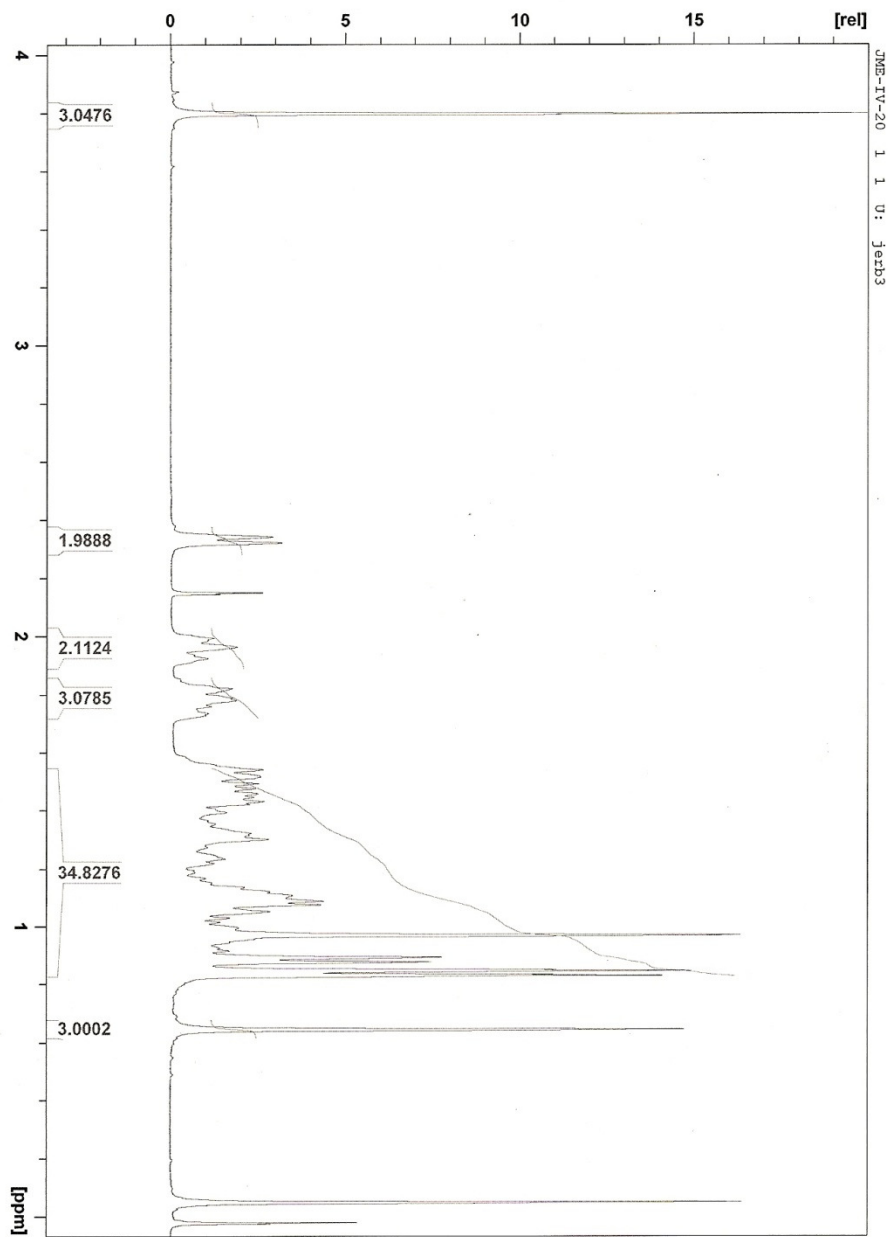

<sup>13</sup>C NMR for 3e – 400 MHz, CDCl<sub>3</sub>

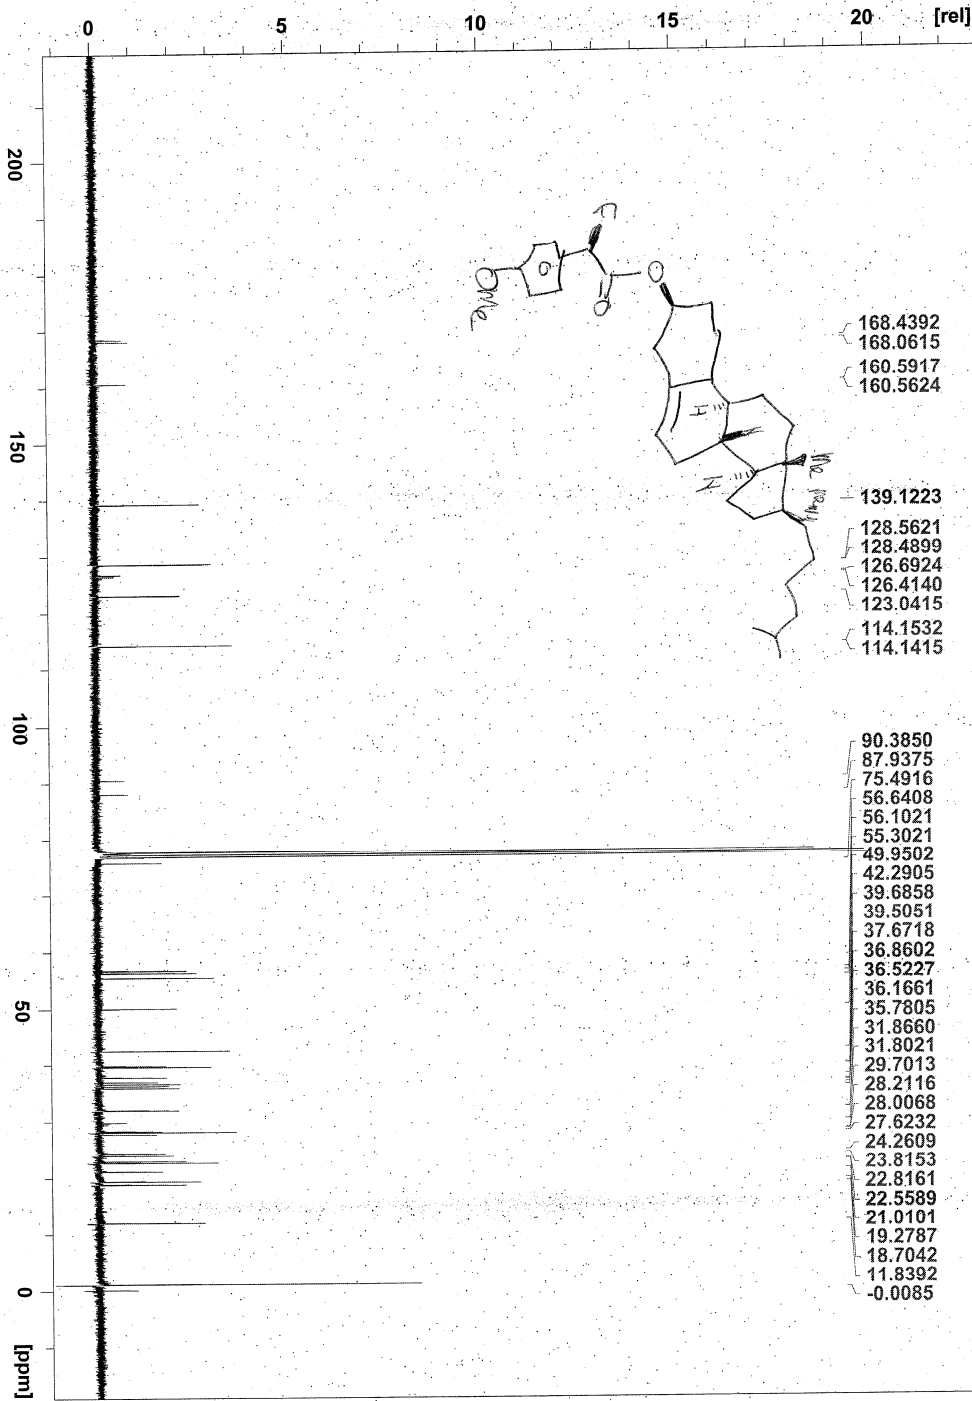

[SP: 30]

$^{19}\text{F}$  NMR for 3e – 300 MHz,  $\text{CDCl}_3$

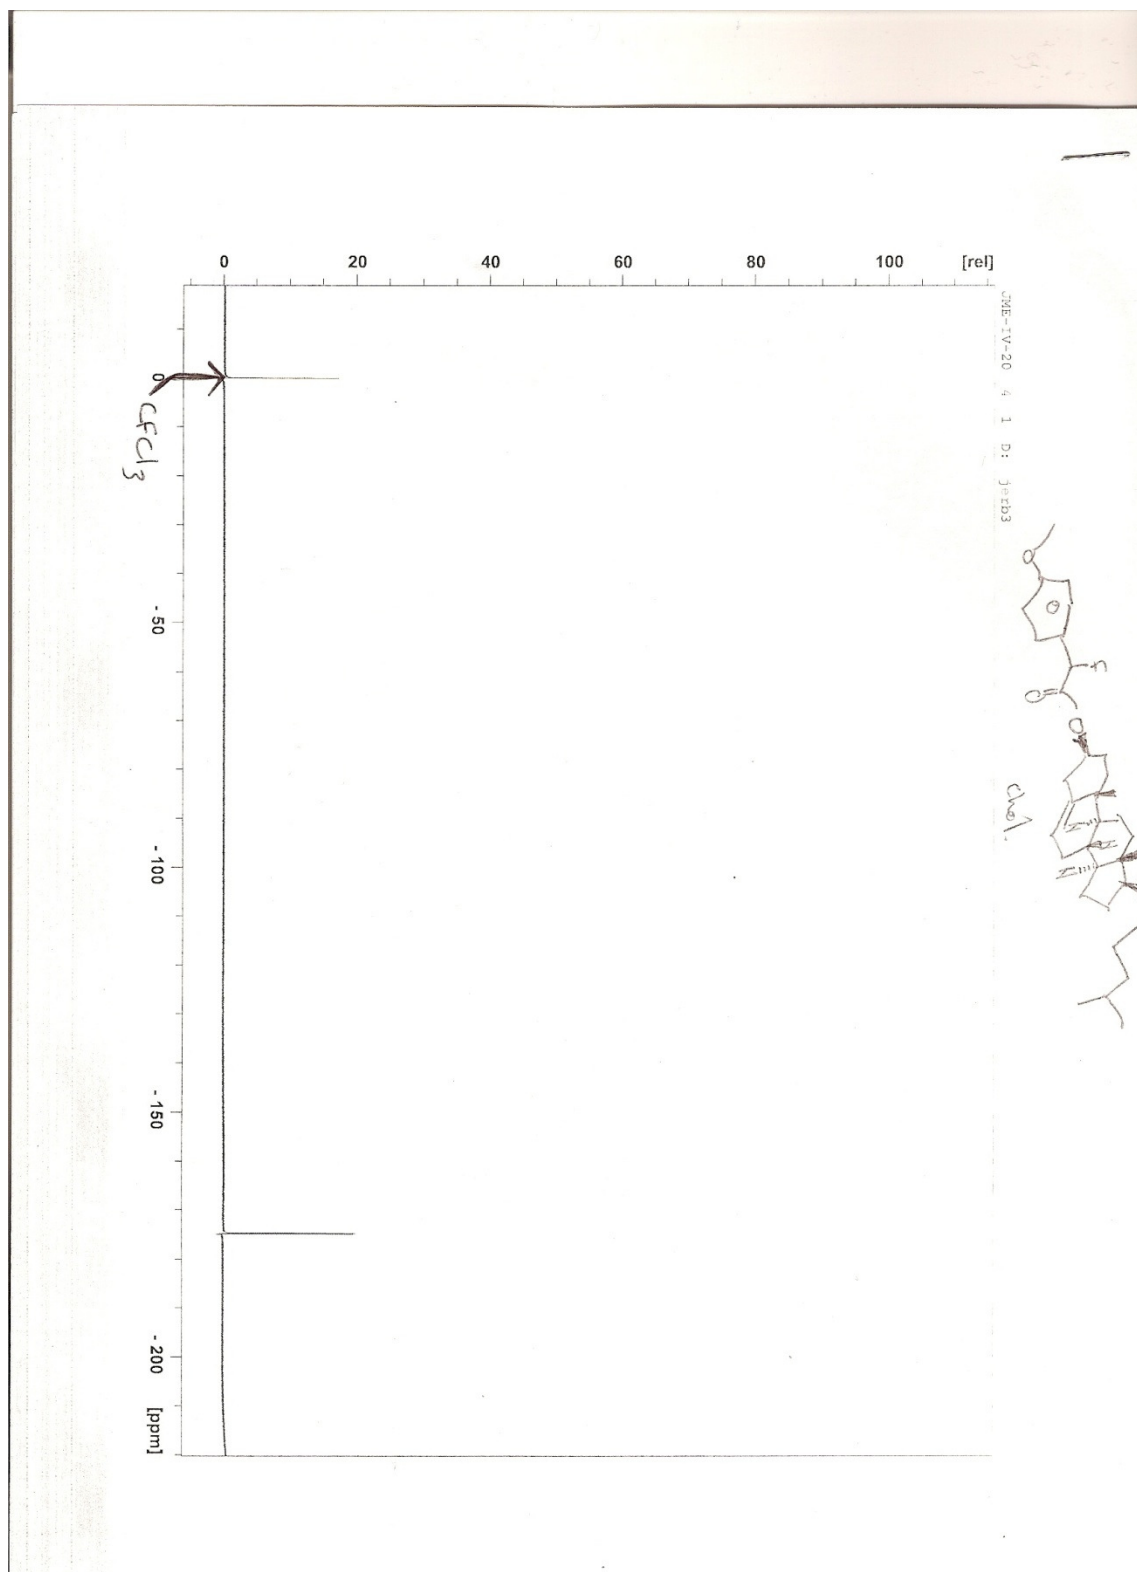

[SP: 31]

$^{19}\text{F}$  NMR for 3e – 300 MHz,  $\text{CDCl}_3$

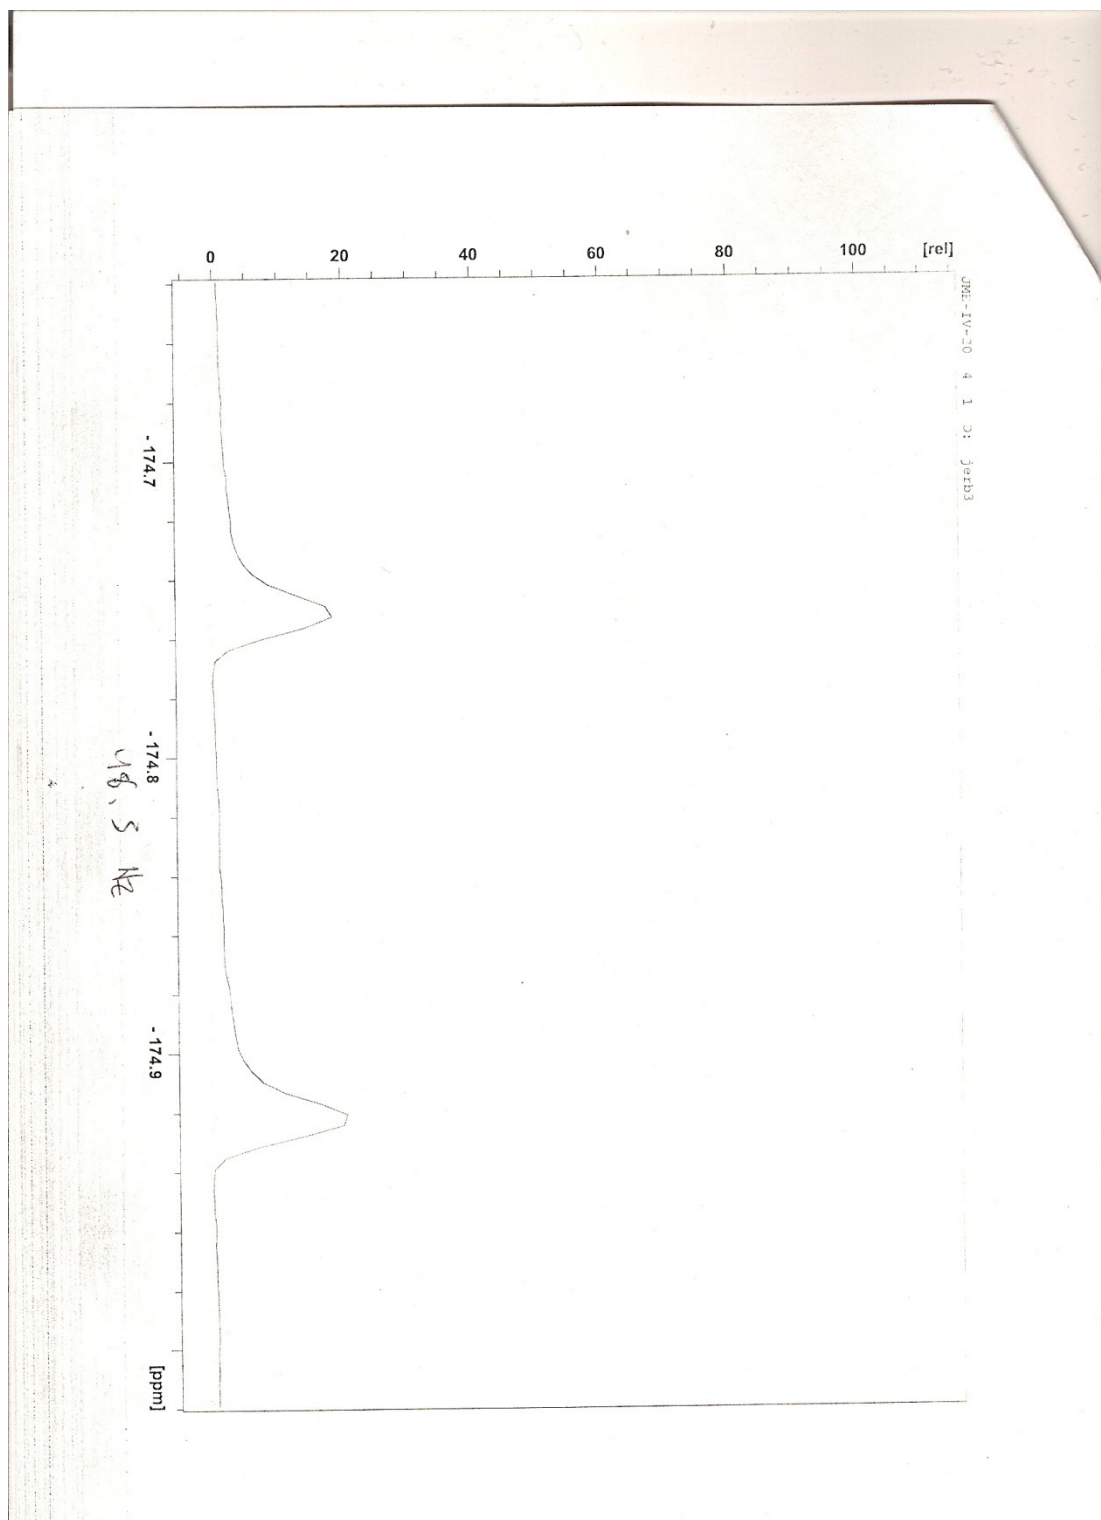



$^1\text{H}$  NMR for 3f – 400 MHz,  $\text{CDCl}_3$

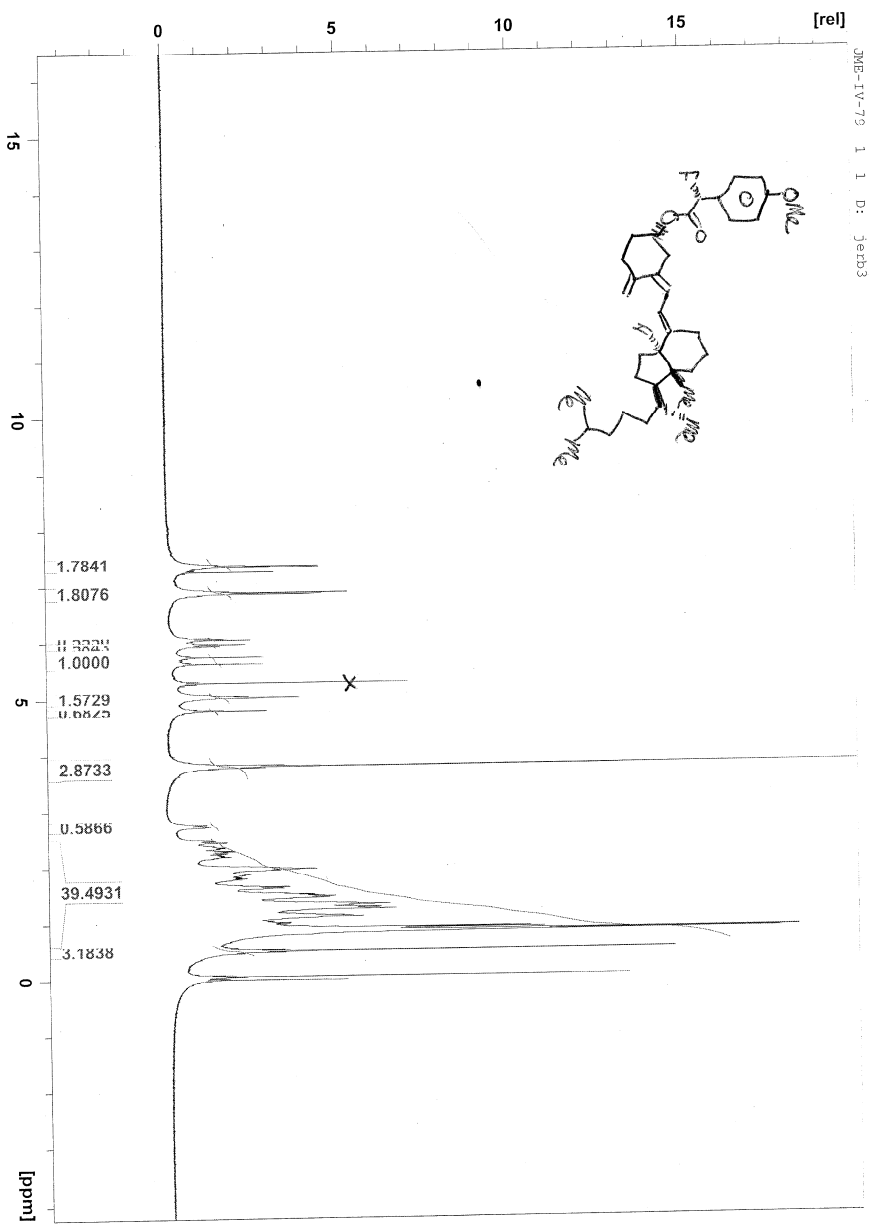

*[Handwritten scribble]*

$^1\text{H}$  NMR for 3f – 400 MHz,  $\text{CDCl}_3$

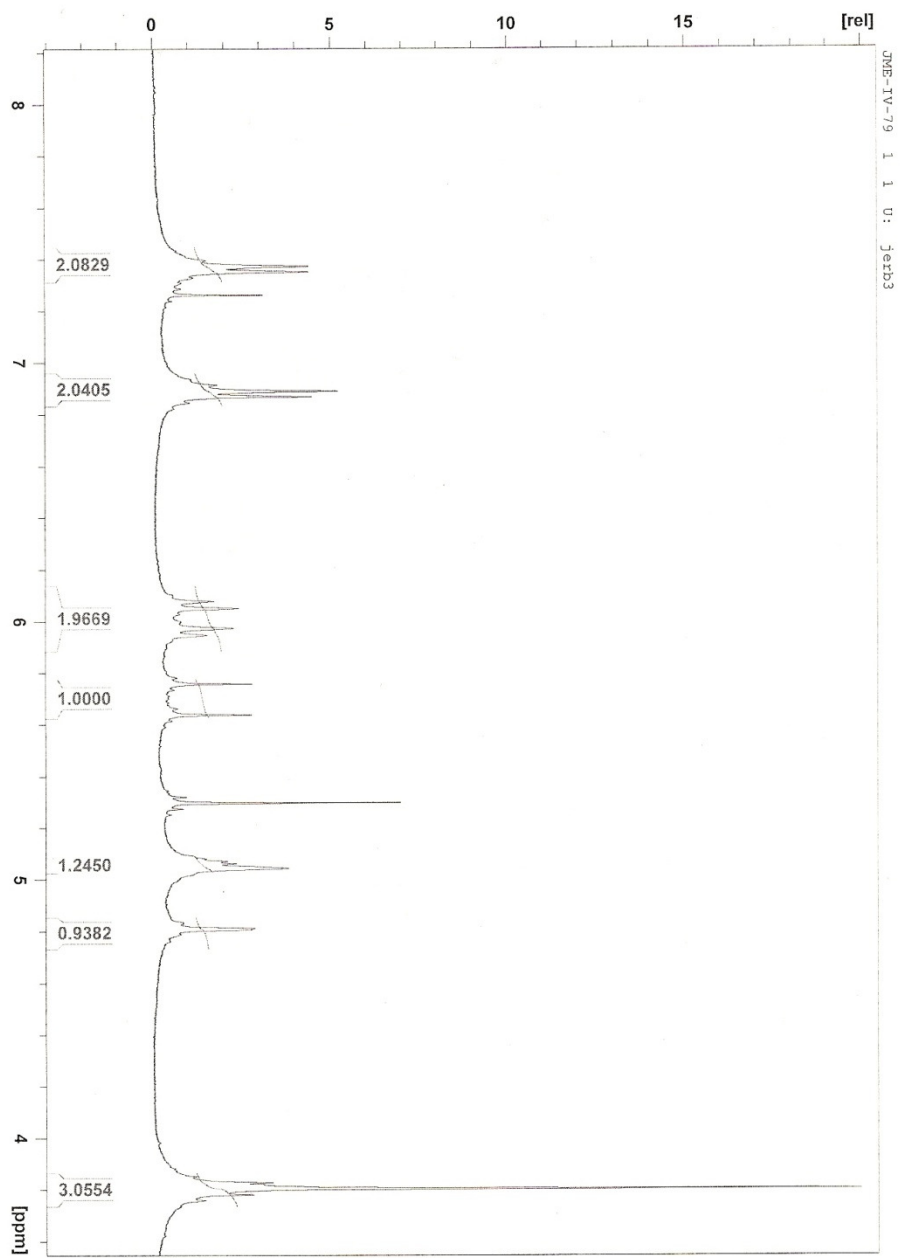

$^1\text{H}$  NMR for 3f – 400 MHz,  $\text{CDCl}_3$

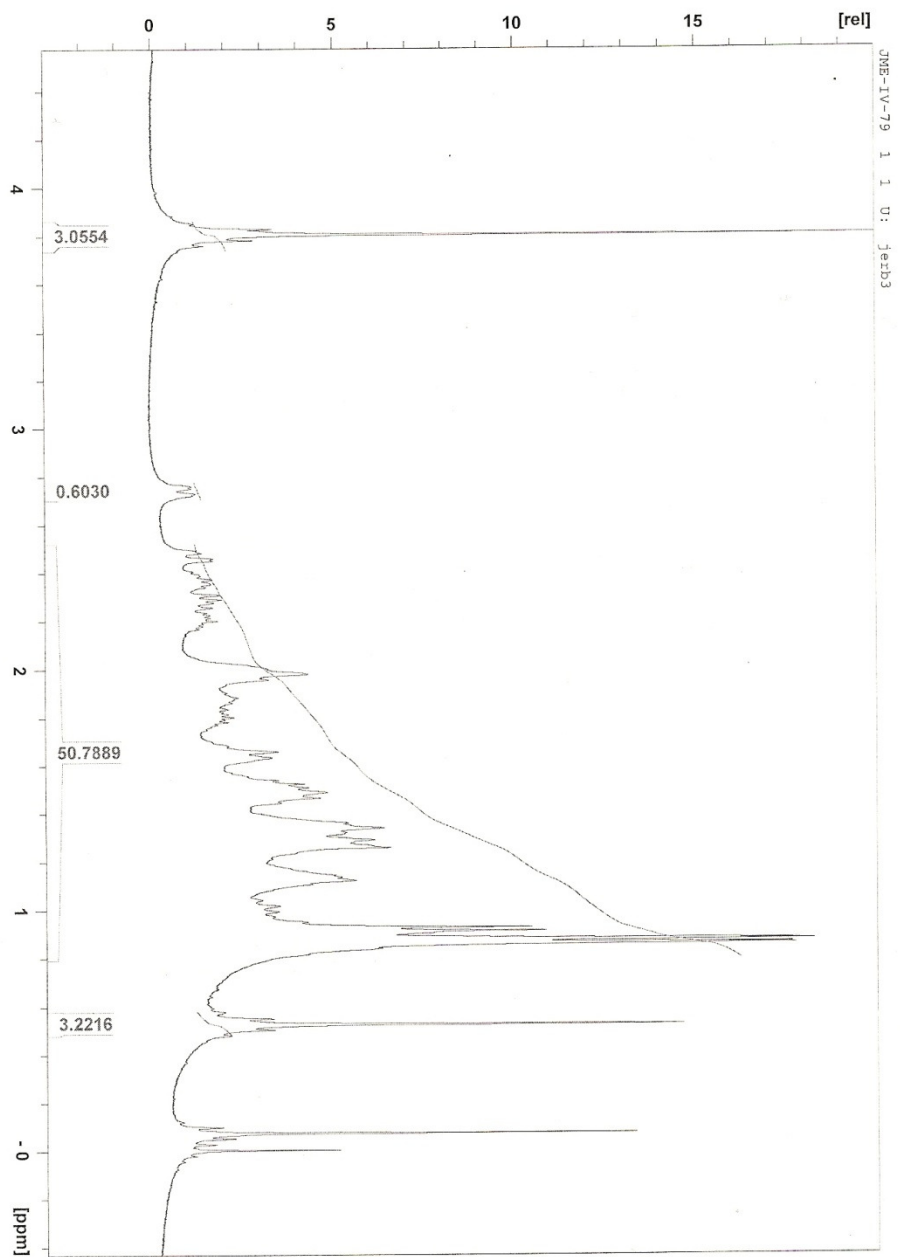

$^{13}\text{C}$  NMR for 3f – 400 MHz,  $\text{CDCl}_3$

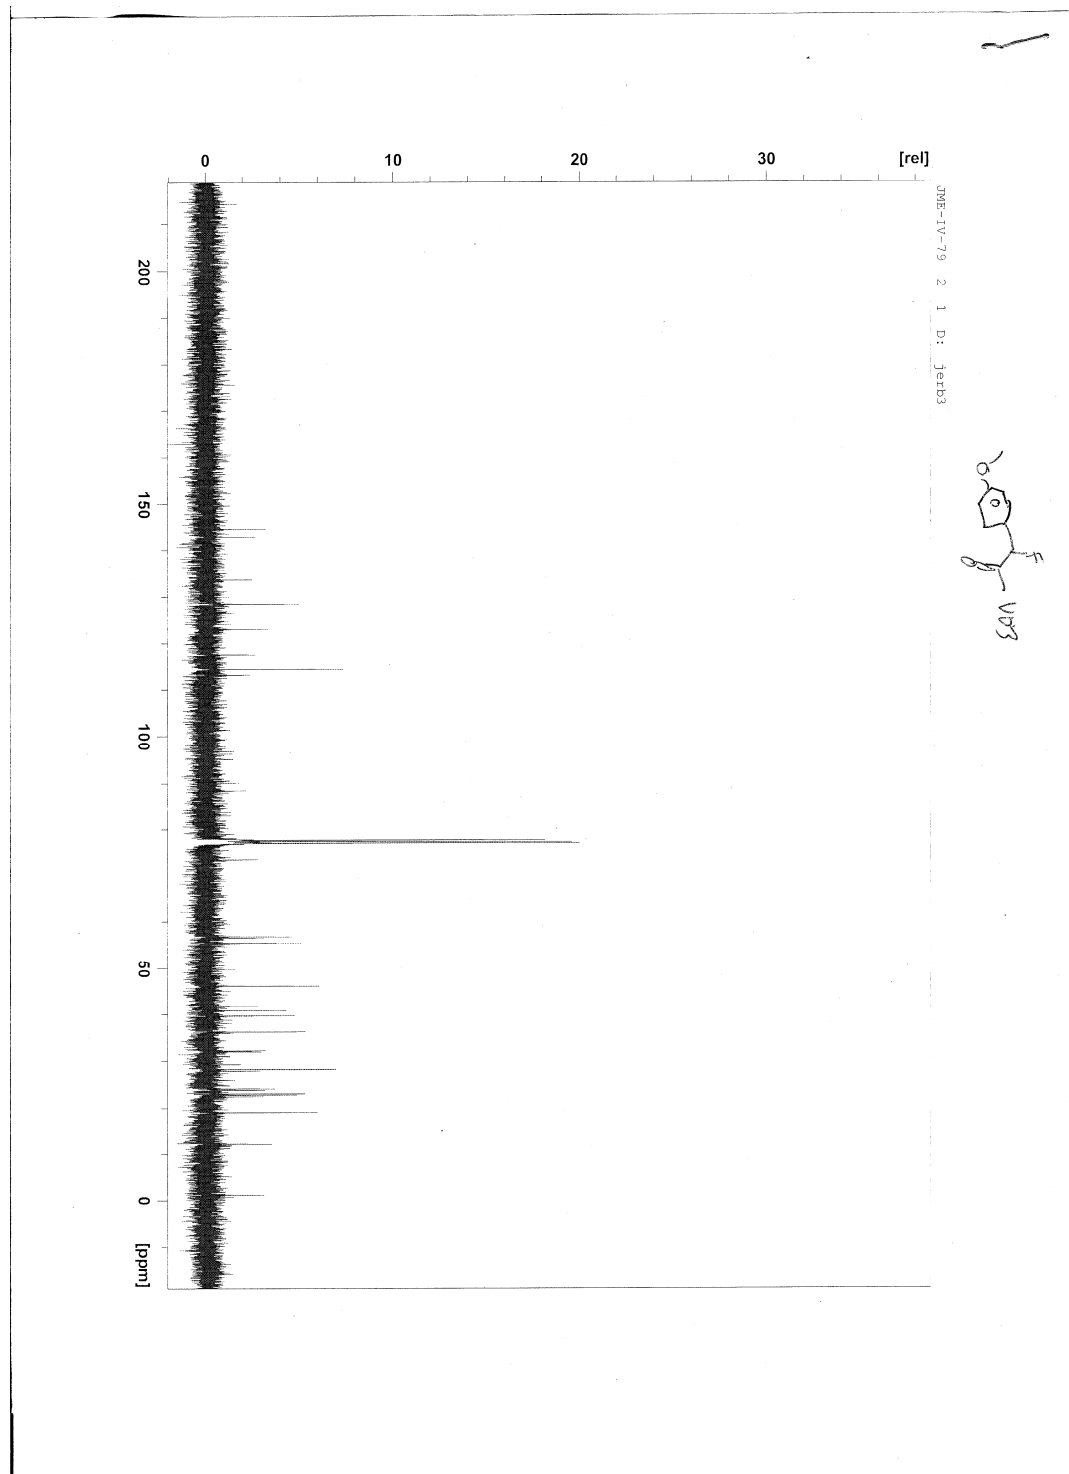

$^{19}\text{F}$  NMR for 3f – 300 MHz,  $\text{CDCl}_3$

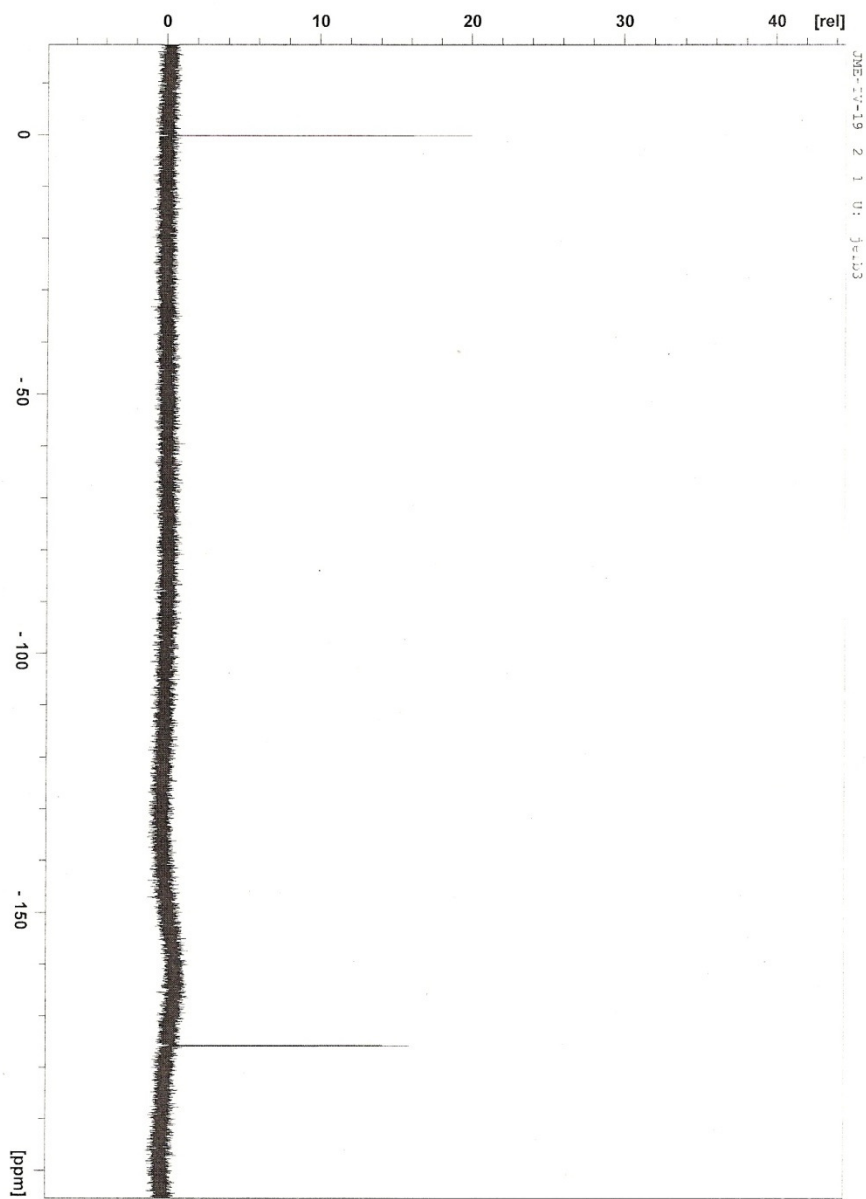

[SP: 37]

$^{19}\text{F}$  NMR for 3f – 300 MHz,  $\text{CDCl}_3$

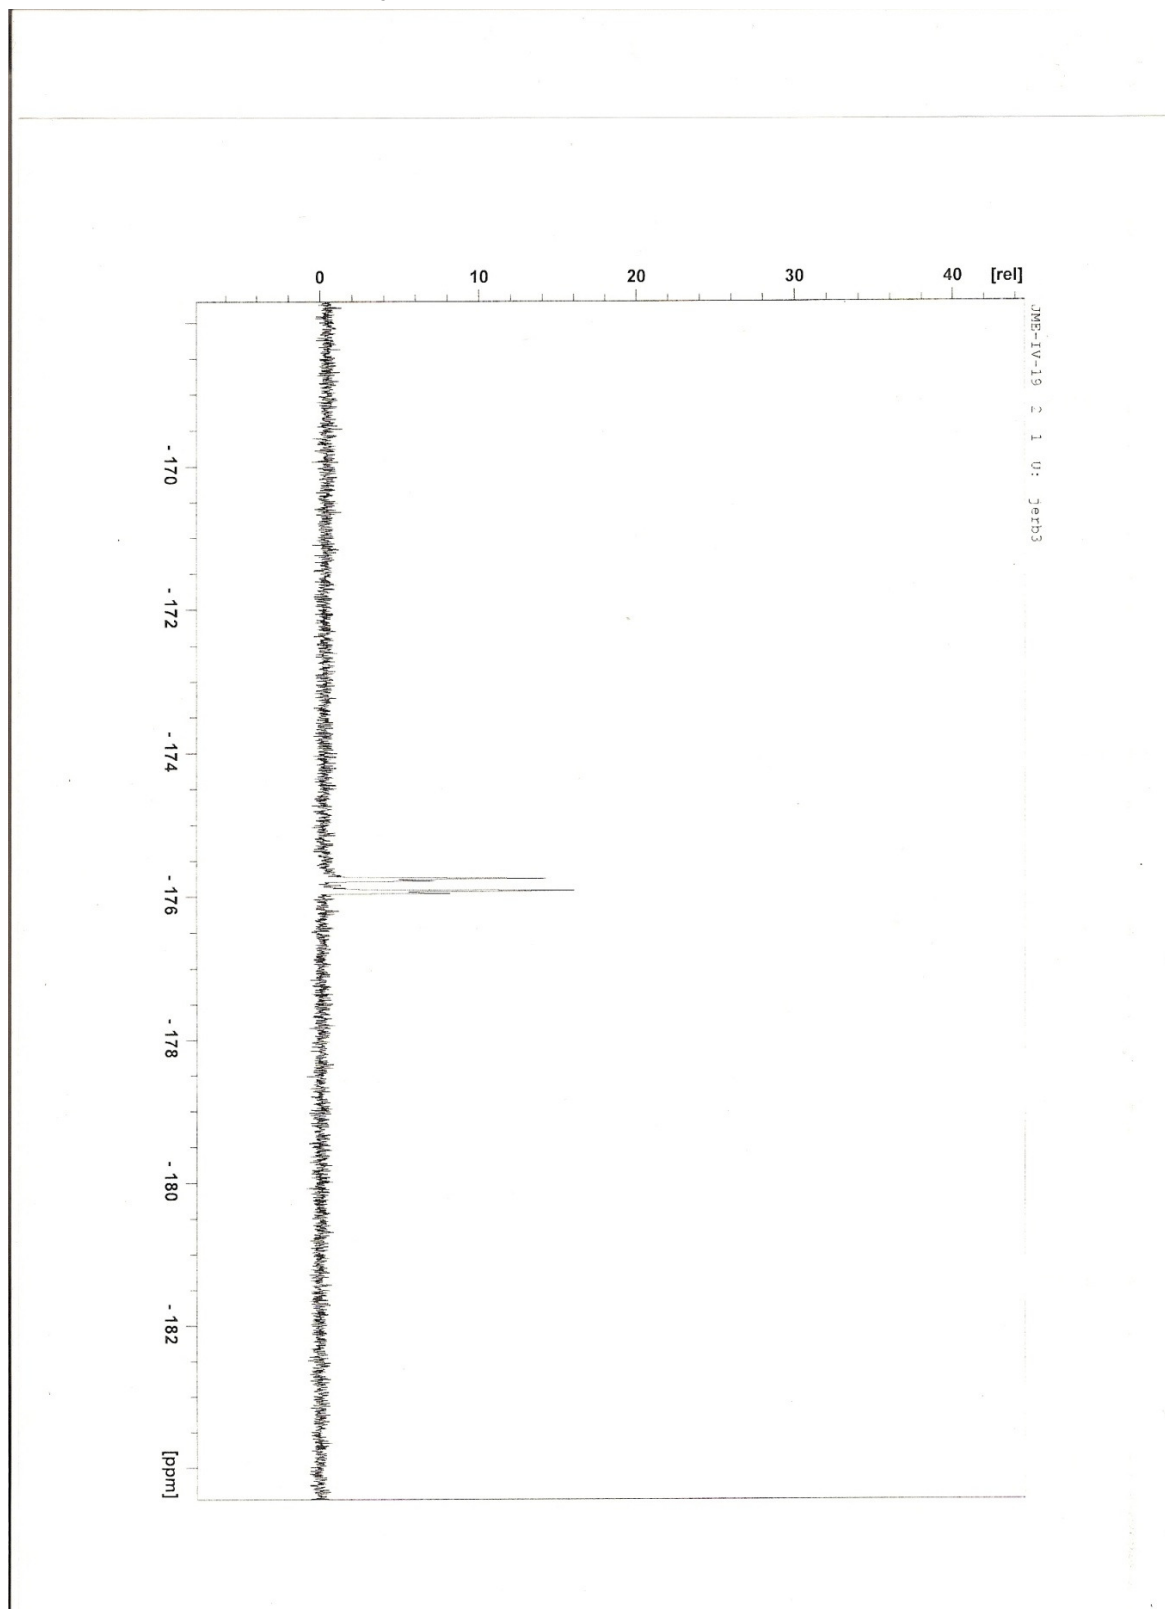

$^1\text{H}$  NMR for 3g – 400 MHz,  $\text{CDCl}_3$

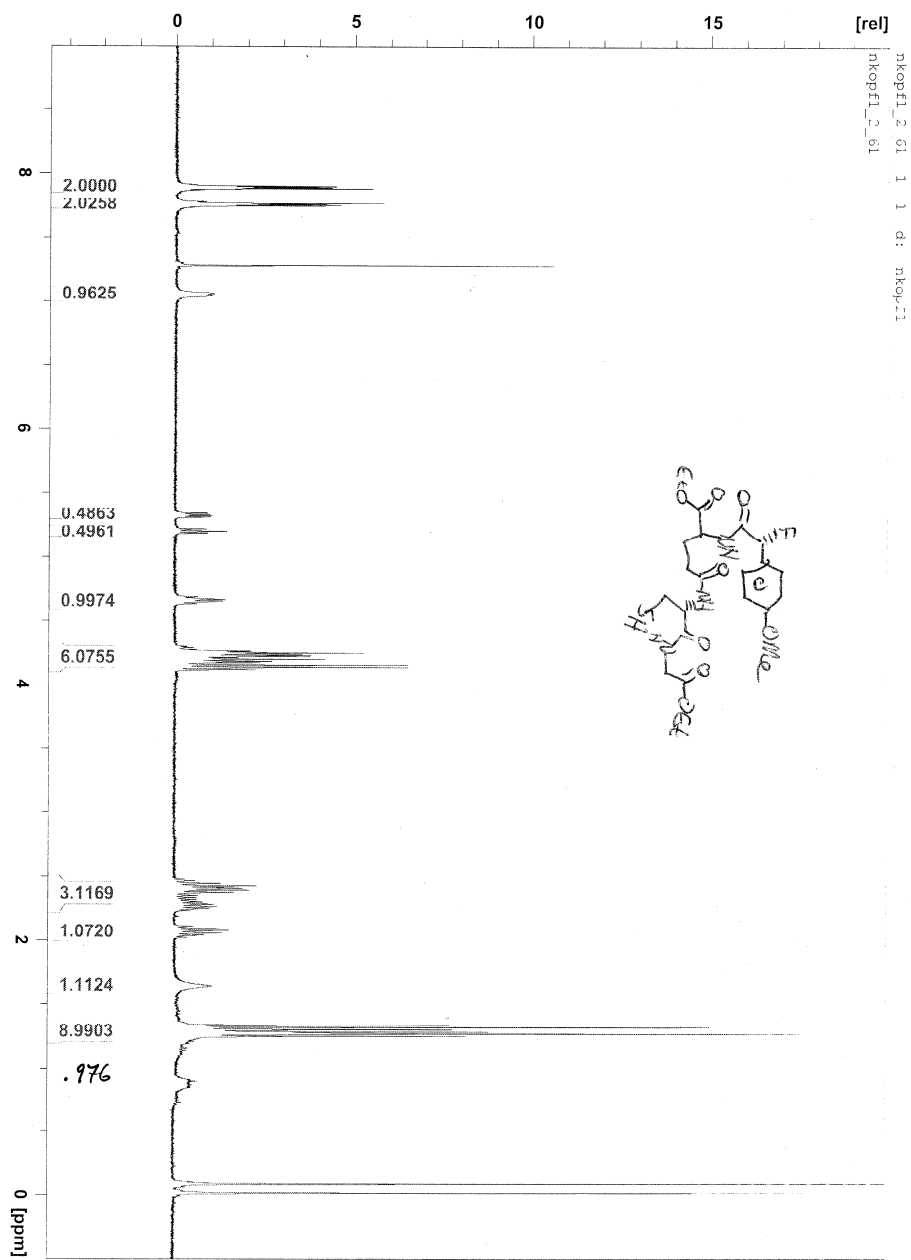

<sup>13</sup>C NMR for 3g – 400 MHz, CDCl<sub>3</sub>

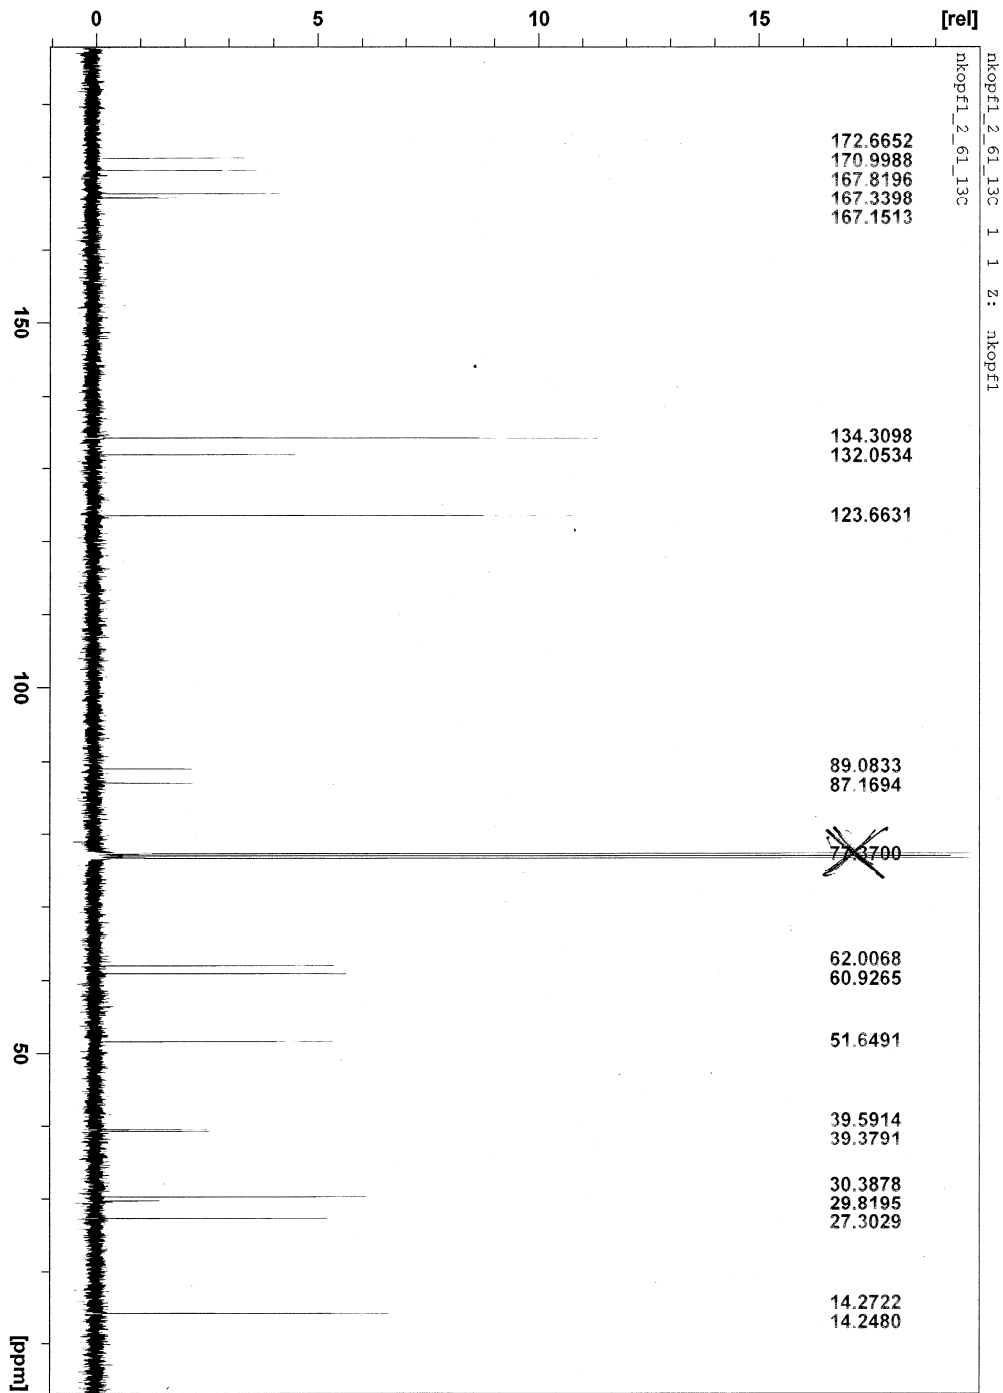



$^{19}\text{F}$  NMR for 3g – 300 MHz,  $\text{CDCl}_3$

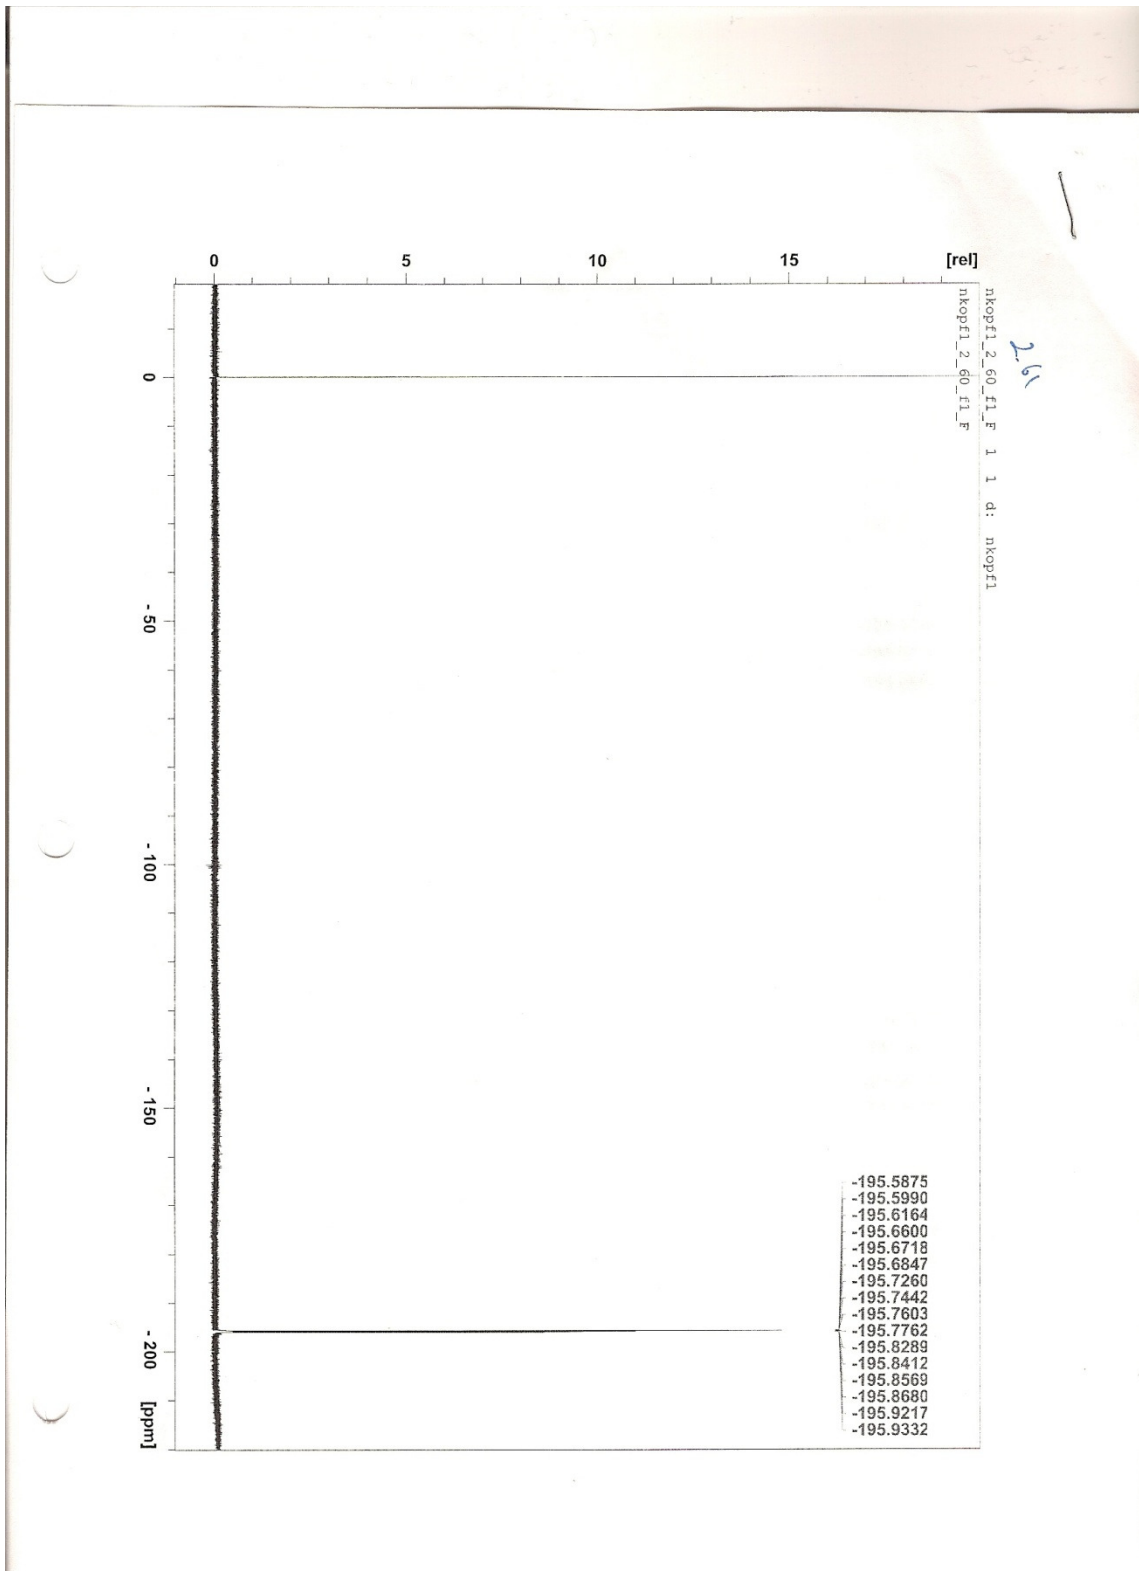

$^{19}\text{F}$  NMR for 3g – 300 MHz,  $\text{CDCl}_3$

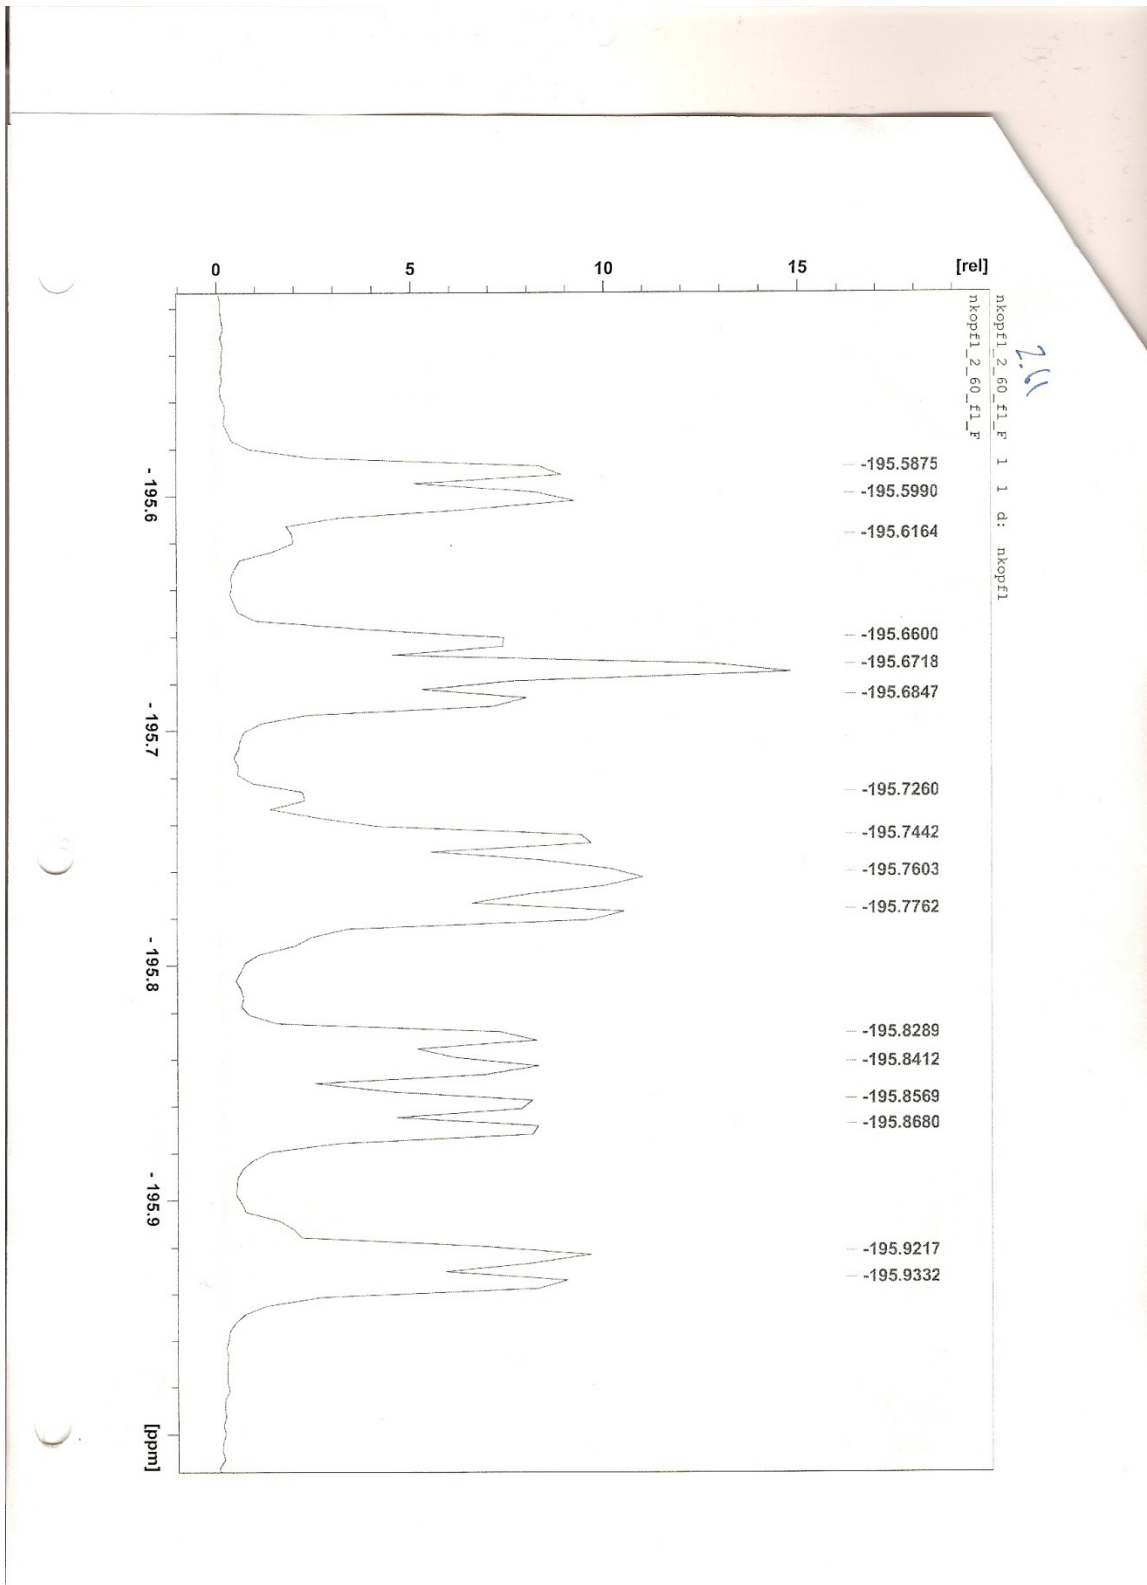

$^1\text{H}$  NMR for 3h – 400 MHz,  $\text{CDCl}_3$

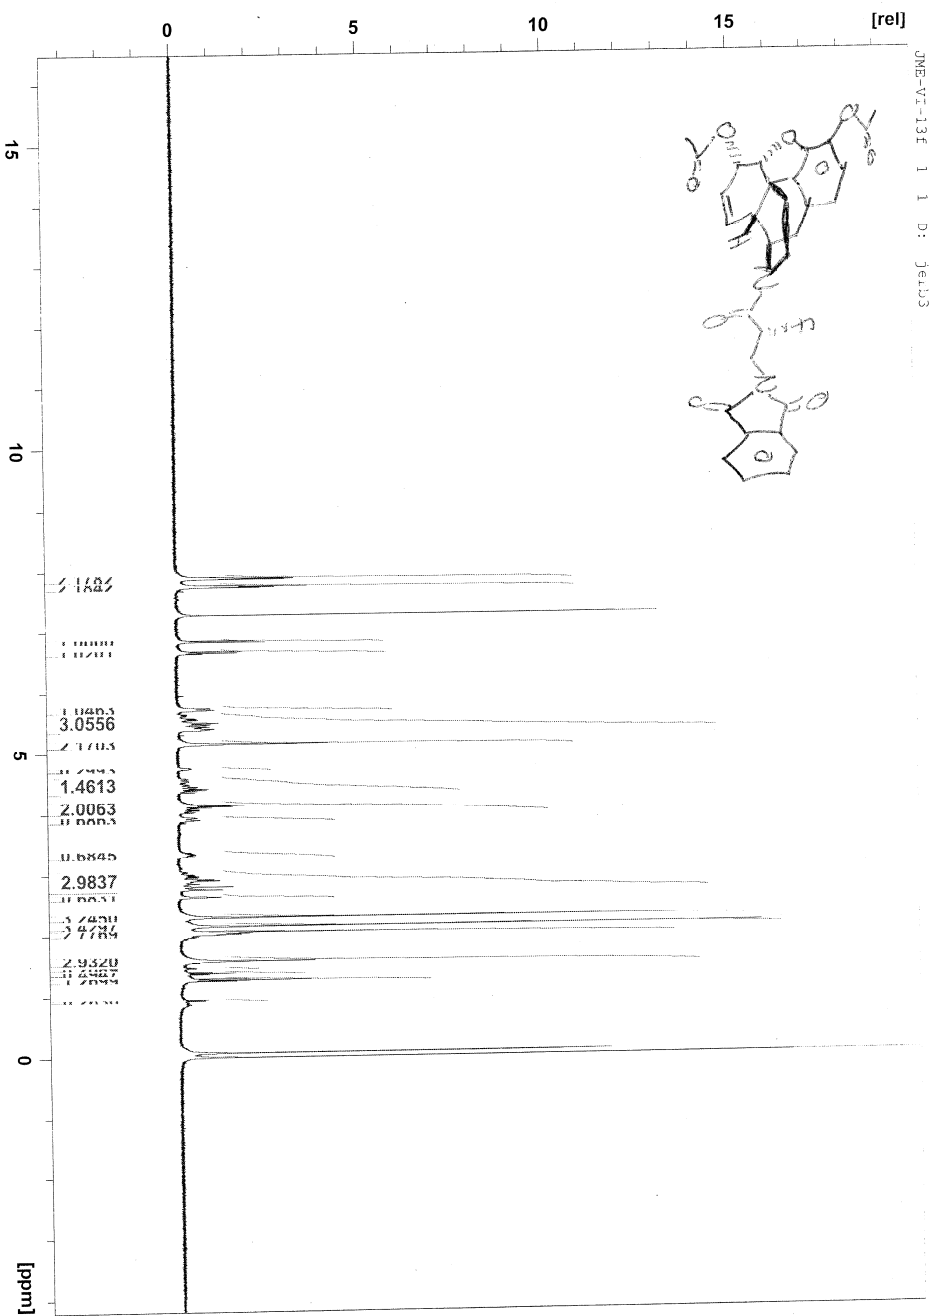

$^1\text{H}$  NMR for 3h – 400 MHz,  $\text{CDCl}_3$

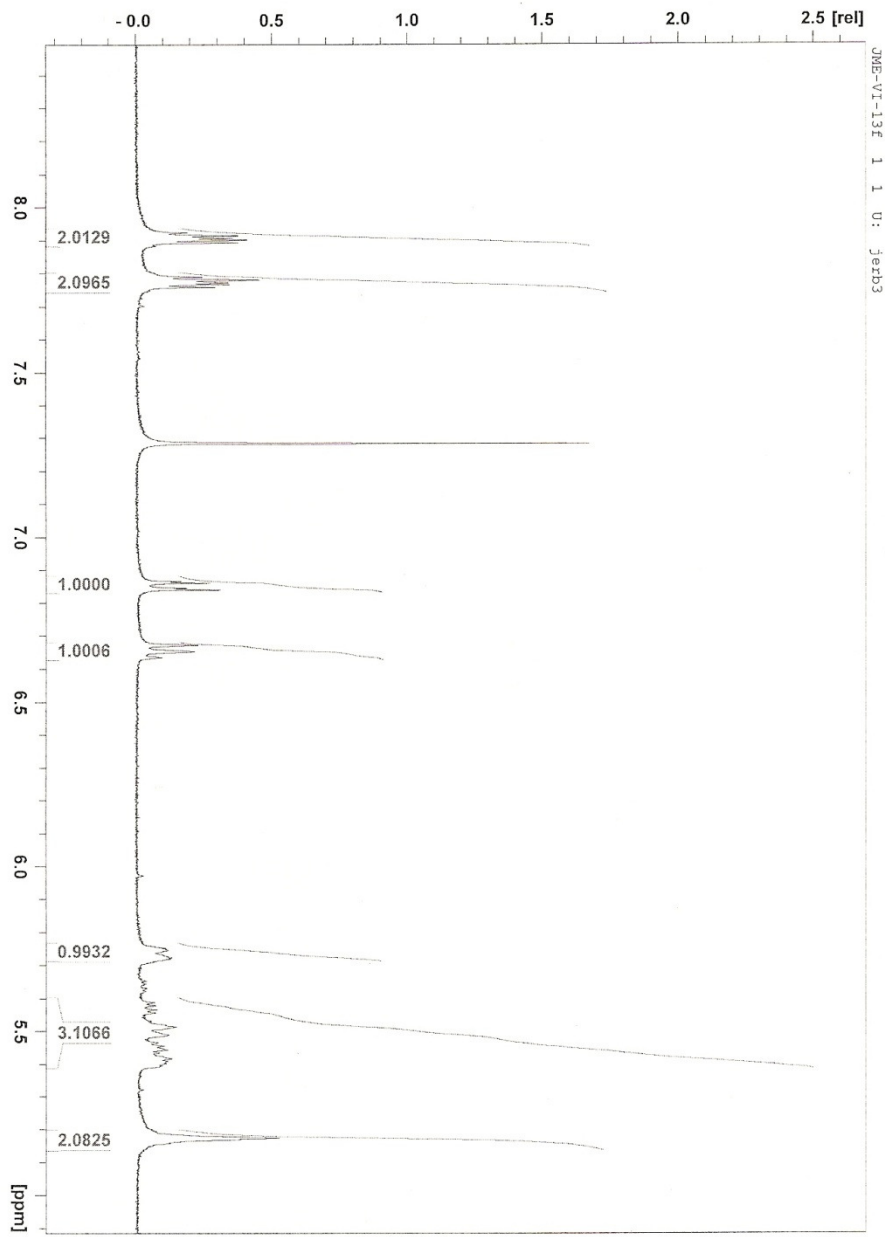

$^1\text{H}$  NMR for 3h – 400 MHz,  $\text{CDCl}_3$

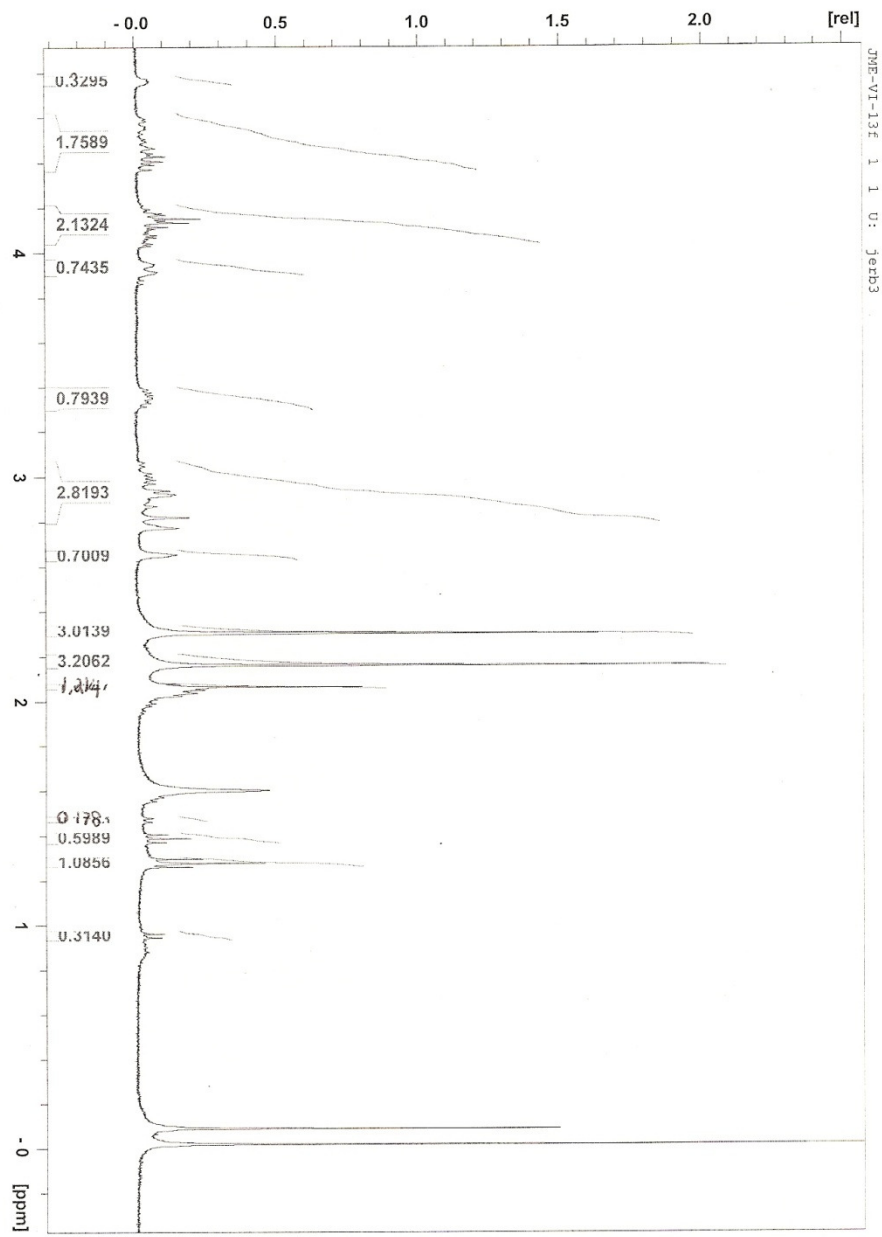

<sup>13</sup>C NMR for 3h – 400 MHz, CDCl<sub>3</sub>

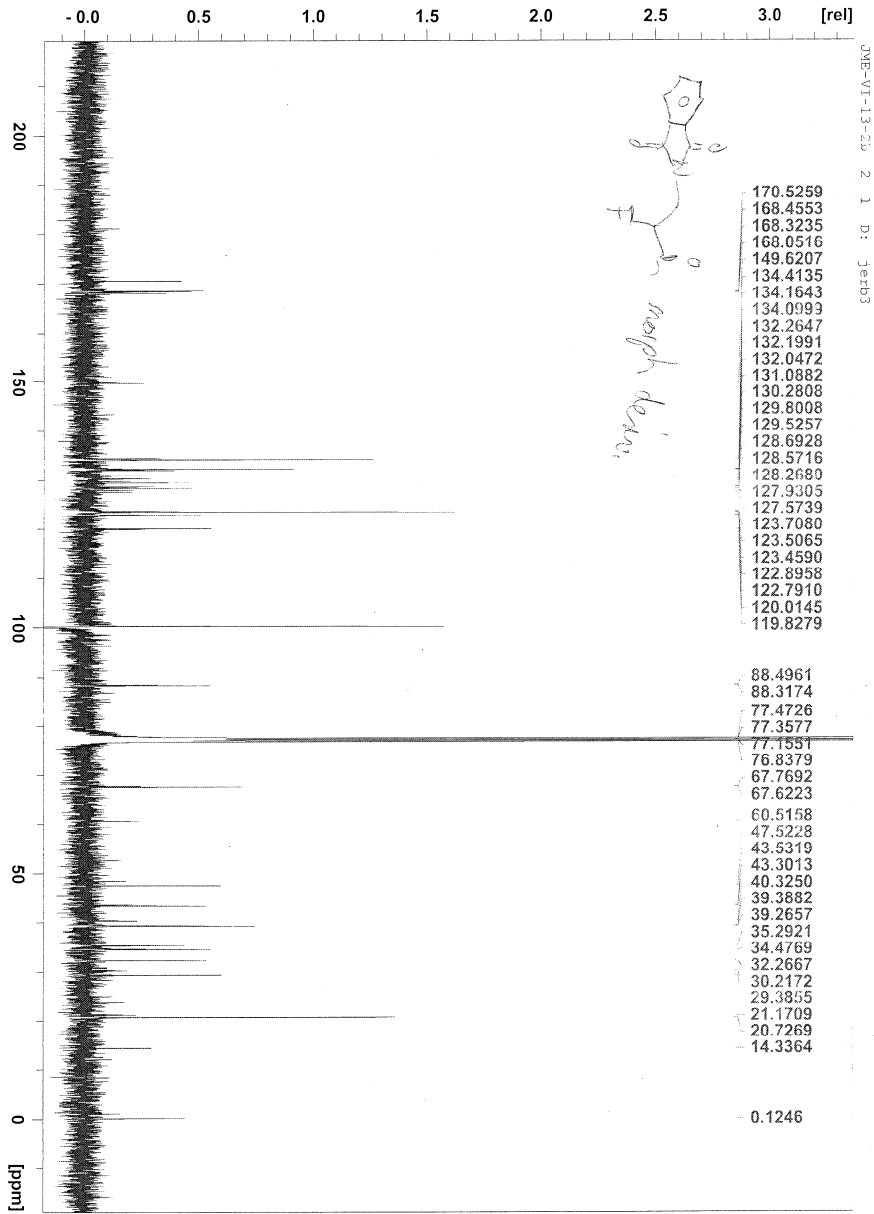

$^{19}\text{F}$  NMR for 3h – 300 MHz,  $\text{CDCl}_3$

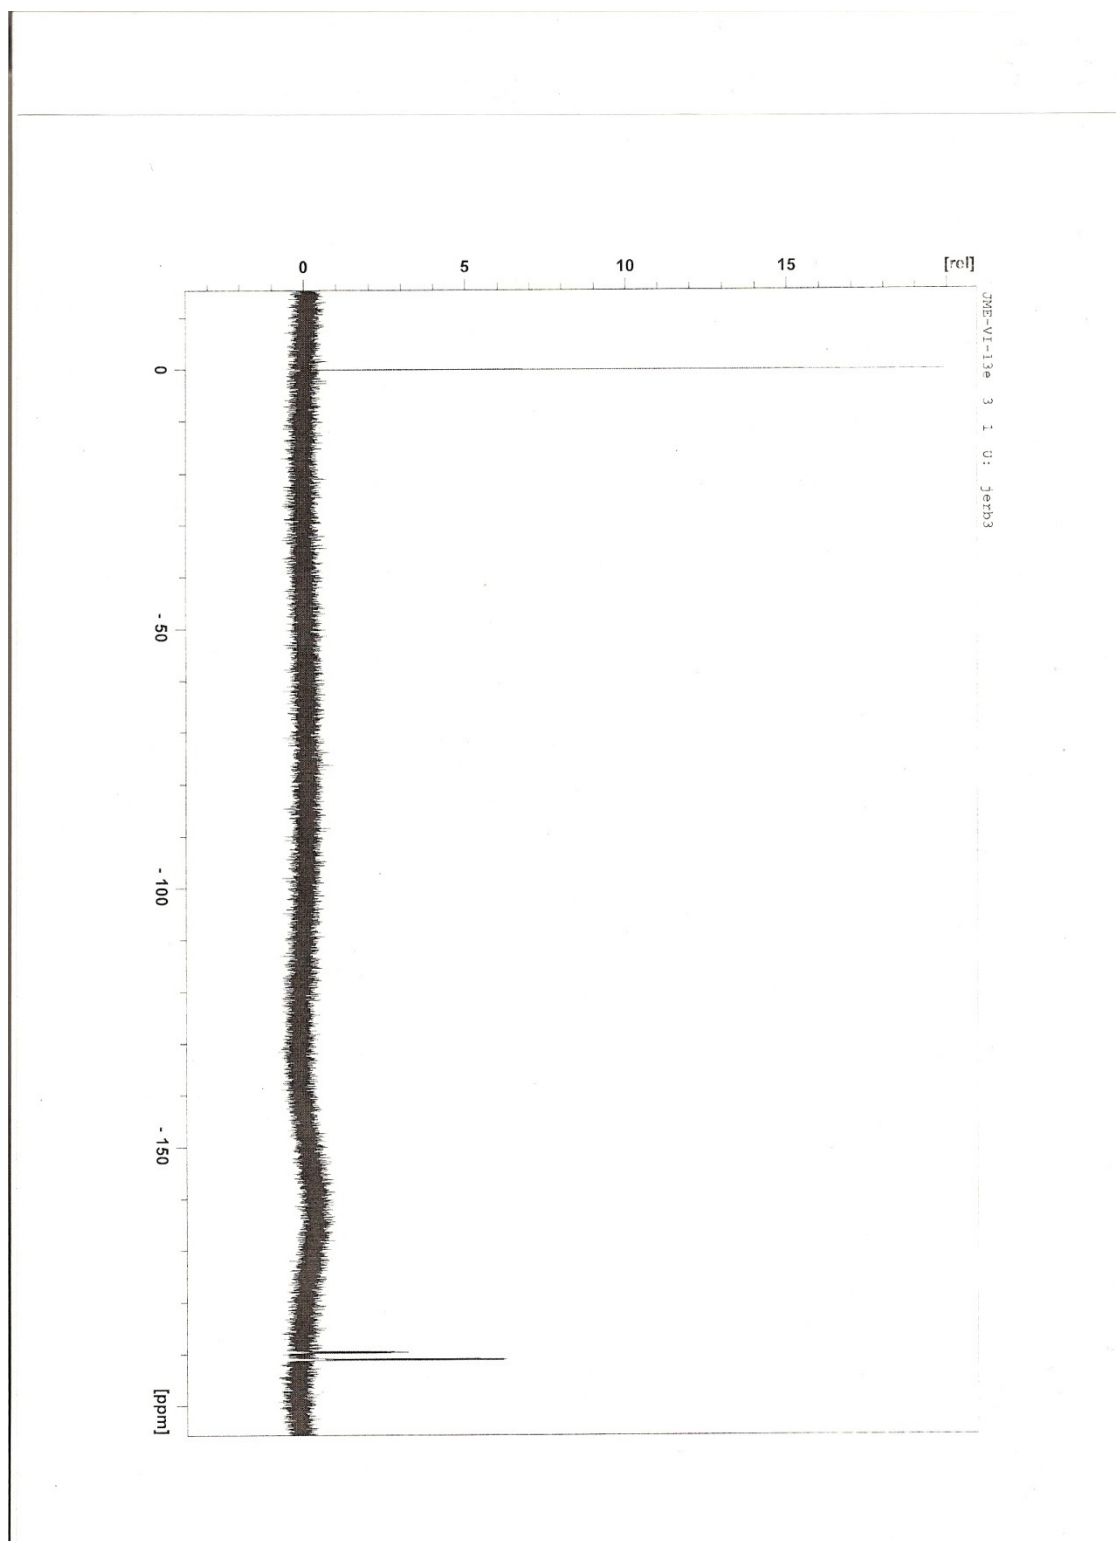

$^{19}\text{F}$  NMR for 3h – 300 MHz,  $\text{CDCl}_3$

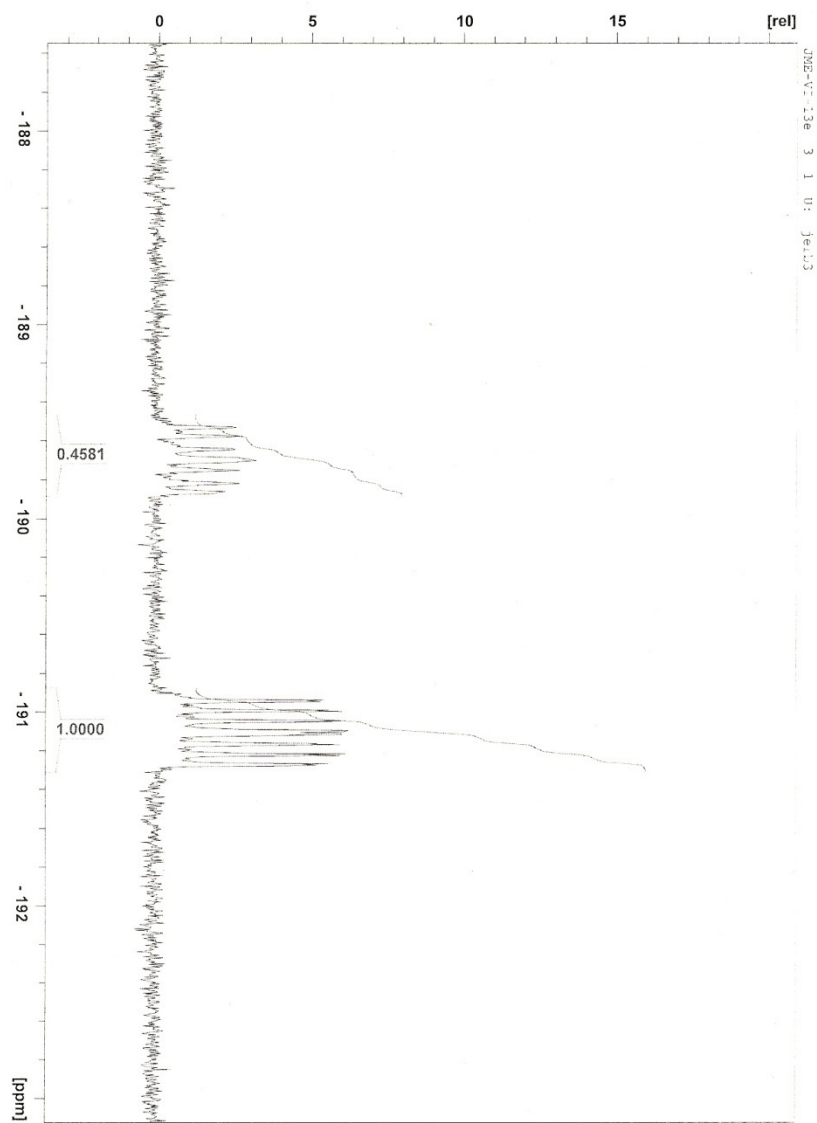



<sup>1</sup>H NMR for 3i – 400 MHz, CDCl<sub>3</sub>

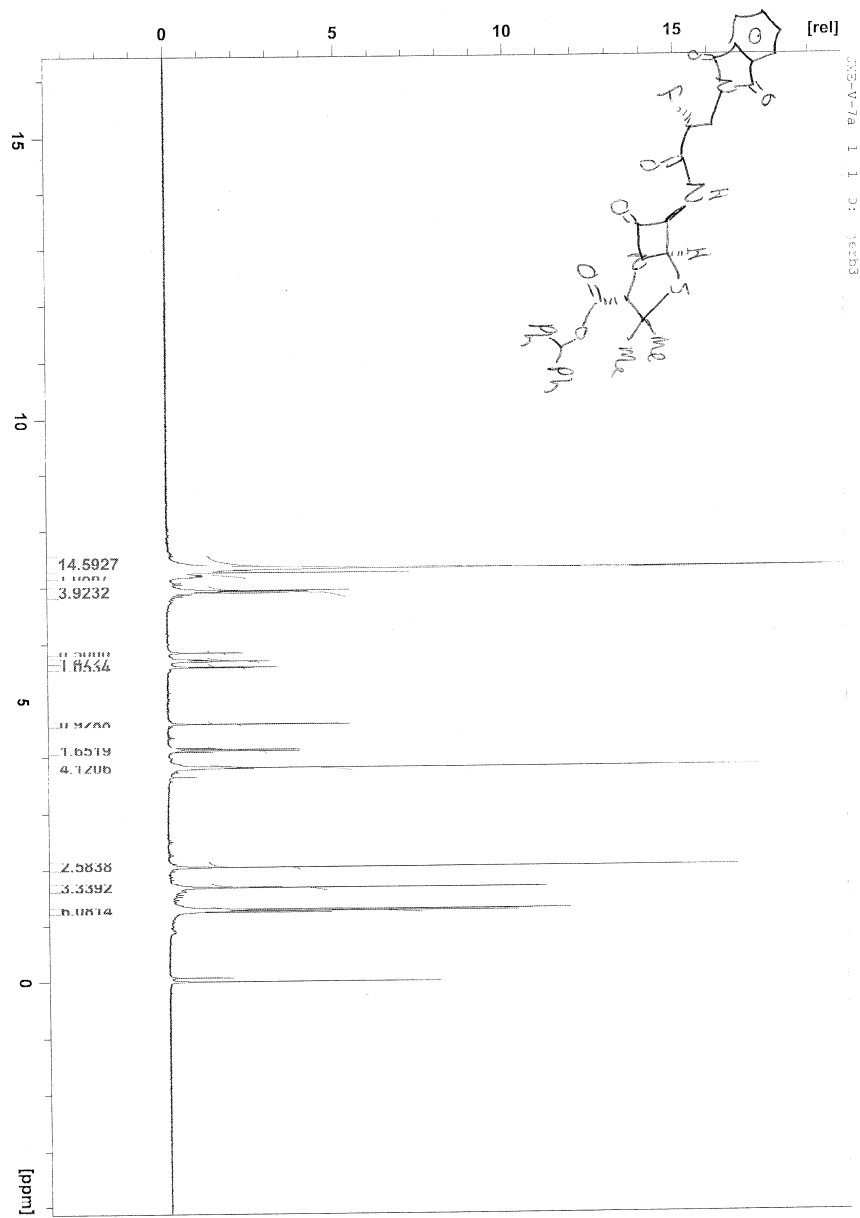

$^1\text{H}$  NMR for 3i – 400 MHz,  $\text{CDCl}_3$

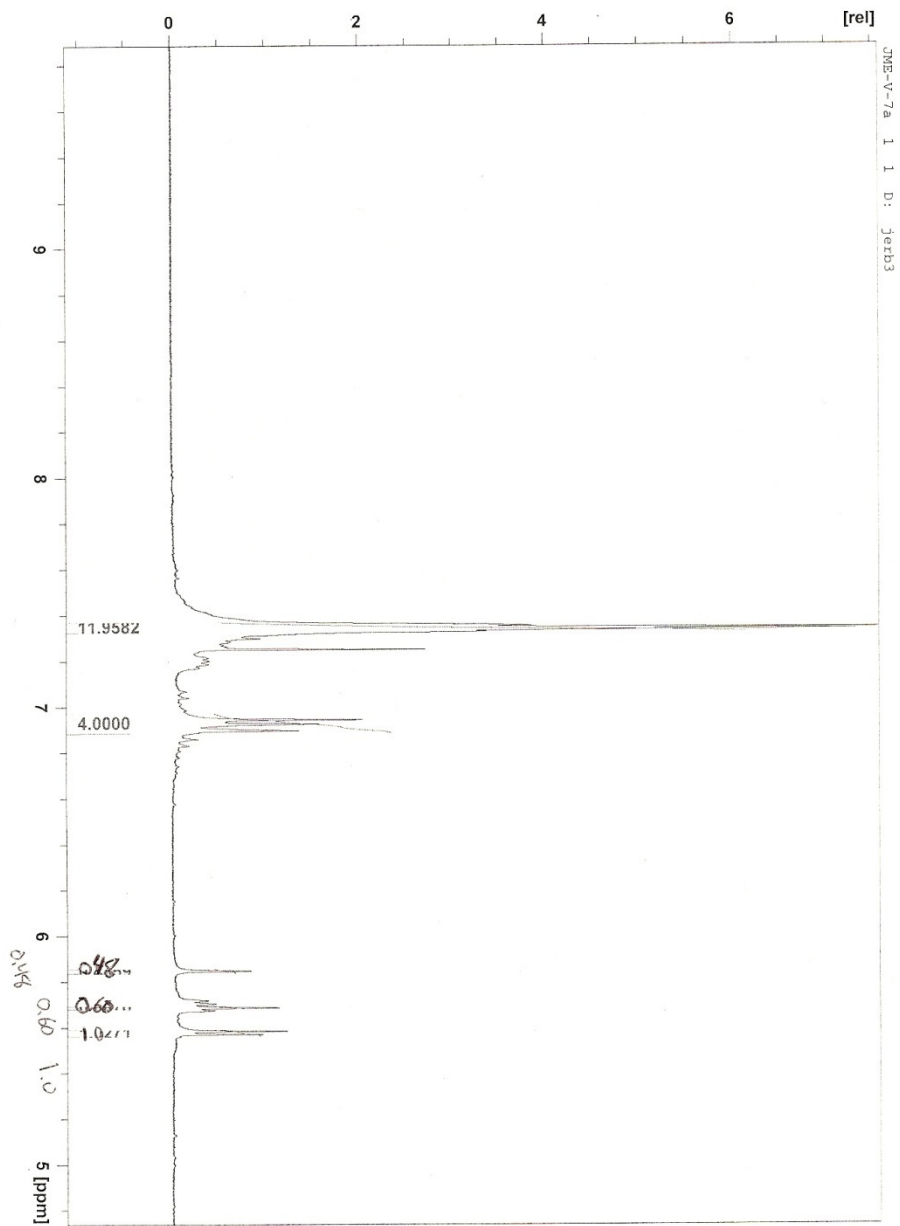

$^1\text{H}$  NMR for 3i – 400 MHz,  $\text{CDCl}_3$

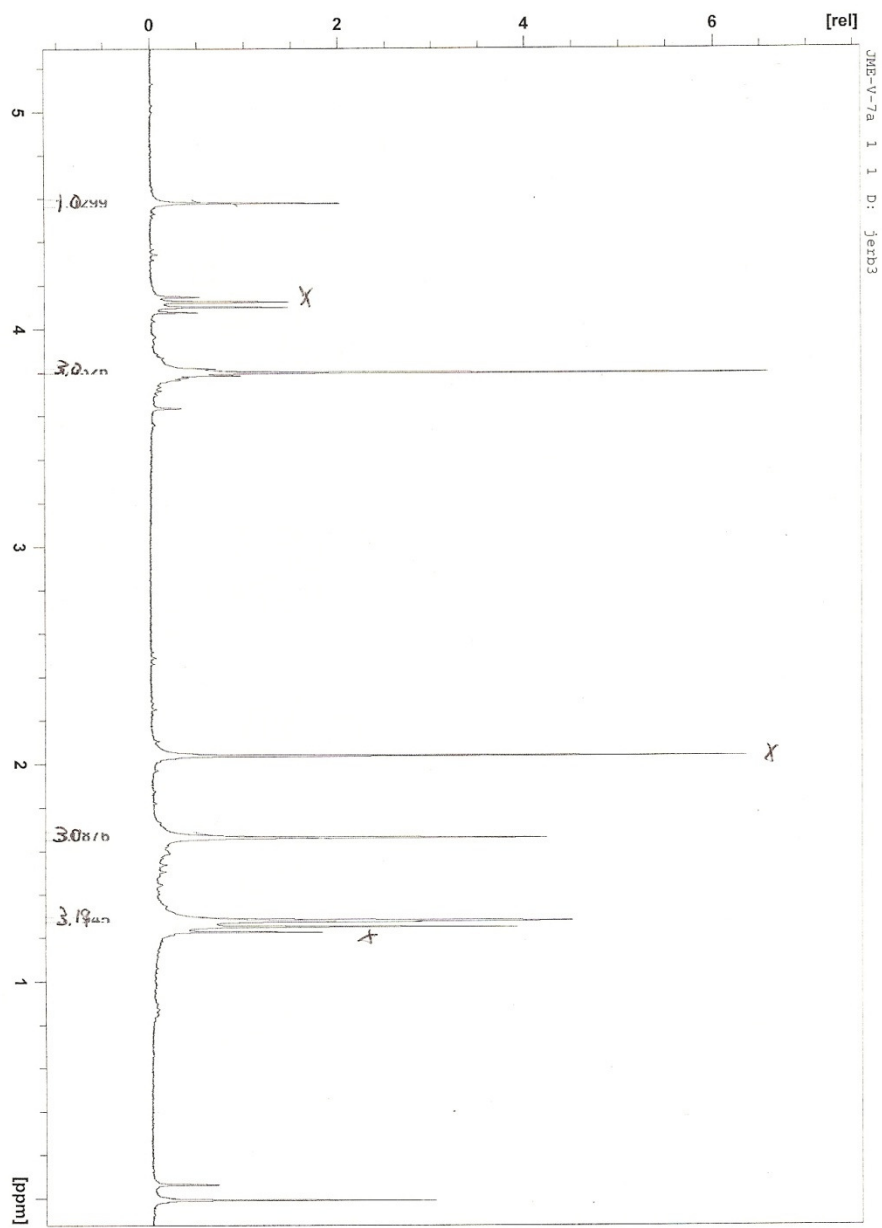

[SP: 51]



$^{19}\text{F}$  NMR for 3i – 300 MHz,  $\text{CDCl}_3$

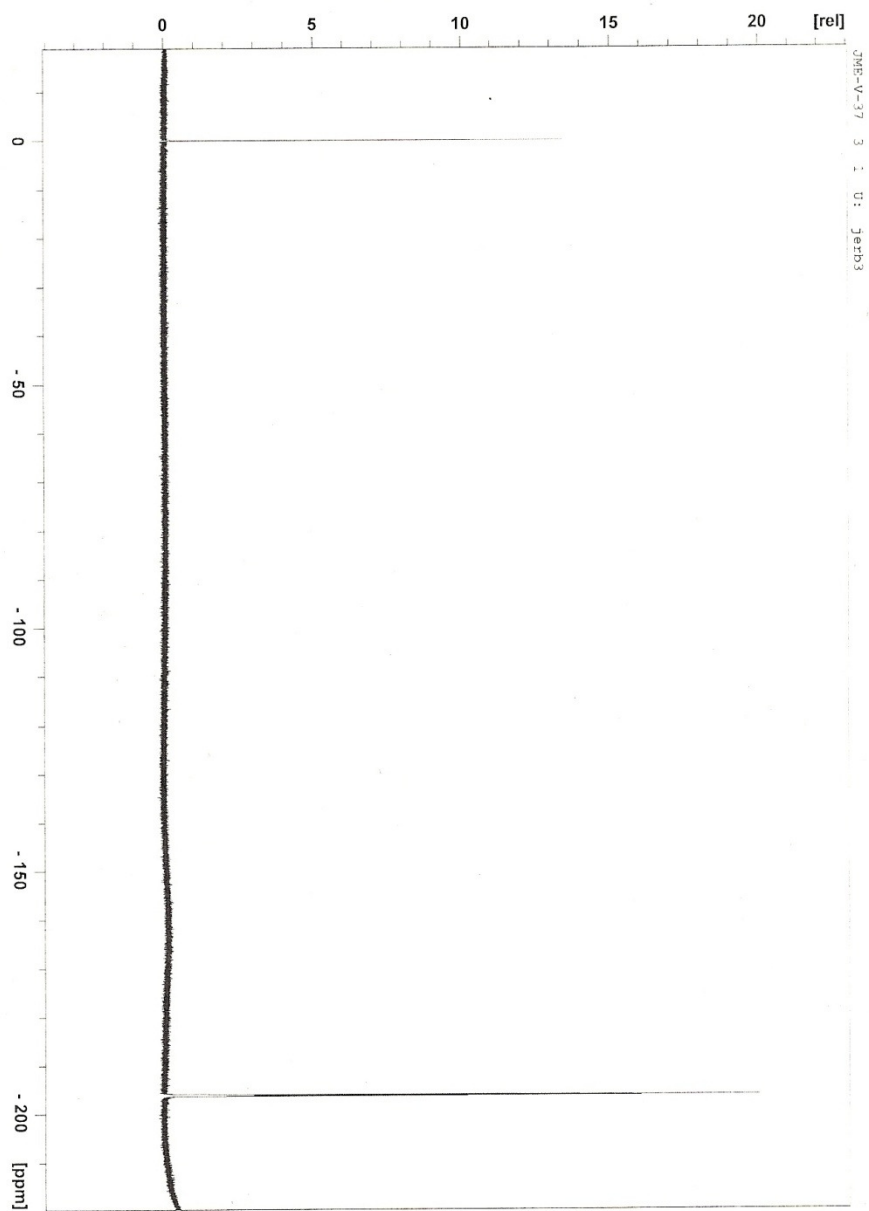

[SP: 53]

$^{19}\text{F}$  NMR for 3i – 300 MHz,  $\text{CDCl}_3$

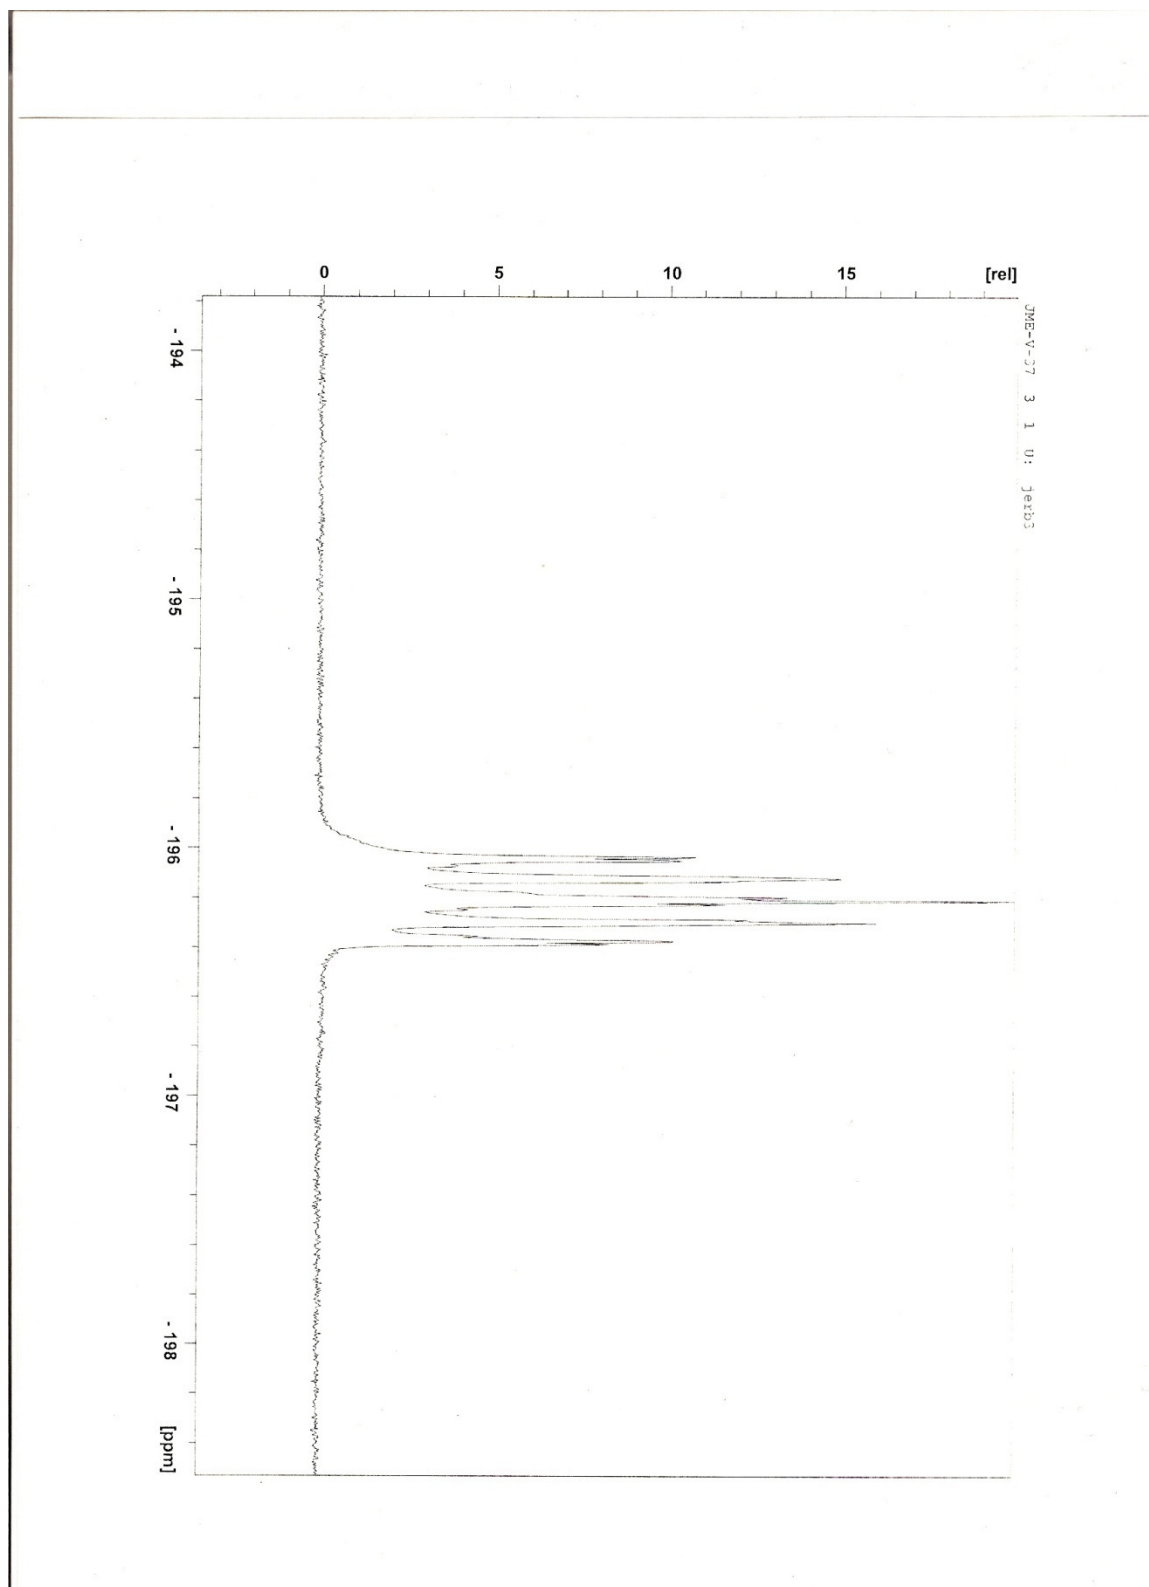

[SP: 54]
